# Supplementary material for: β-Phenylproline: the high β-turn forming propensity of proline combined with an aromatic side chain
Source: Royal Society of Chemistry journal article supplement (doi:10.1039/c1ob06561k), 2011-10-05
Supplement: c1ob06561k.pdf [file c1ob06561k.pdf]

## Supplementary Information

for

# $\beta$ -Phenylproline: the high $\beta$ -turn forming propensity of proline combined with an aromatic side chain

Paola Fatás, Ana I. Jiménez, M. Isabel Calaza, and Carlos Cativiela

### Contents

|                                                                                       |               |
|---------------------------------------------------------------------------------------|---------------|
| Geometrical parameters for the X-ray diffraction structures of <b>1–4</b> , <b>4a</b> | Pages S2–S34  |
| Characterization of compounds <b>1a–4a</b>                                            | Pages S35–S36 |
| <sup>1</sup> H-NMR, <sup>13</sup> C-NMR and NOESY spectra of compounds <b>1–4</b>     | Pages S37–S48 |

Geometrical parameters for the X-ray diffraction structures of 1-4, 4a

Atom numbering for all structures:

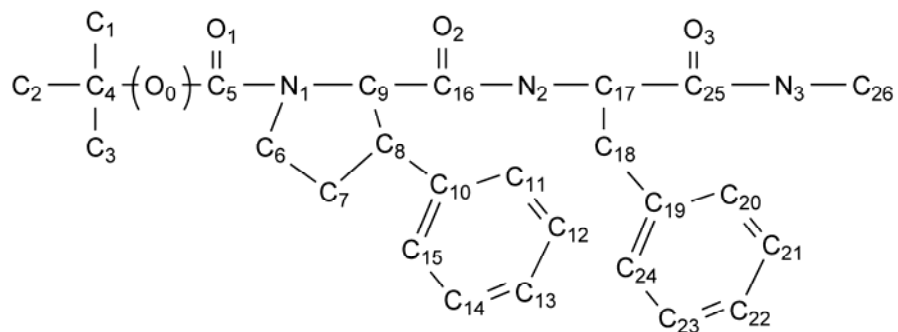

**Geometrical parameters for the X-ray diffraction structure of  
Piv-L-cis( $\beta$ Ph)Pro-L-Phe-NHMe (1)**

**Bond lengths [Å] with standard deviations for 1.**

---

|             |            |
|-------------|------------|
| O(1)-C(5)   | 1.2419(19) |
| O(2)-C(16)  | 1.236(2)   |
| O(3)-C(25)  | 1.238(2)   |
| N(1)-C(5)   | 1.347(2)   |
| N(1)-C(9)   | 1.474(2)   |
| N(1)-C(6)   | 1.476(2)   |
| N(2)-C(16)  | 1.344(2)   |
| N(2)-C(17)  | 1.453(2)   |
| N(3)-C(25)  | 1.335(2)   |
| N(3)-C(26)  | 1.446(2)   |
| C(1)-C(4)   | 1.536(2)   |
| C(2)-C(4)   | 1.540(2)   |
| C(3)-C(4)   | 1.535(2)   |
| C(4)-C(5)   | 1.538(2)   |
| C(6)-C(7)   | 1.523(2)   |
| C(7)-C(8)   | 1.524(2)   |
| C(8)-C(10)  | 1.515(2)   |
| C(8)-C(9)   | 1.555(2)   |
| C(9)-C(16)  | 1.518(2)   |
| C(10)-C(11) | 1.375(3)   |
| C(10)-C(15) | 1.377(3)   |
| C(11)-C(12) | 1.386(3)   |
| C(12)-C(13) | 1.377(3)   |
| C(13)-C(14) | 1.373(3)   |
| C(14)-C(15) | 1.381(3)   |
| C(17)-C(18) | 1.518(2)   |
| C(17)-C(25) | 1.529(2)   |
| C(18)-C(19) | 1.516(2)   |
| C(19)-C(20) | 1.385(2)   |
| C(19)-C(24) | 1.388(2)   |
| C(20)-C(21) | 1.384(2)   |
| C(21)-C(22) | 1.379(2)   |
| C(22)-C(23) | 1.375(3)   |
| C(23)-C(24) | 1.387(2)   |

---

**Bond angles [deg] with standard deviations for 1.**

---

|                   |            |
|-------------------|------------|
| C(5)-N(1)-C(9)    | 118.75(13) |
| C(5)-N(1)-C(6)    | 128.87(13) |
| C(9)-N(1)-C(6)    | 111.48(13) |
| C(16)-N(2)-C(17)  | 120.76(14) |
| C(25)-N(3)-C(26)  | 120.96(15) |
| C(3)-C(4)-C(1)    | 108.02(15) |
| C(3)-C(4)-C(5)    | 115.02(15) |
| C(1)-C(4)-C(5)    | 107.29(14) |
| C(3)-C(4)-C(2)    | 110.33(15) |
| C(1)-C(4)-C(2)    | 108.10(17) |
| C(5)-C(4)-C(2)    | 107.85(14) |
| O(1)-C(5)-N(1)    | 118.67(15) |
| O(1)-C(5)-C(4)    | 119.19(16) |
| N(1)-C(5)-C(4)    | 122.08(14) |
| N(1)-C(6)-C(7)    | 103.30(13) |
| C(6)-C(7)-C(8)    | 103.38(15) |
| C(10)-C(8)-C(7)   | 116.79(15) |
| C(10)-C(8)-C(9)   | 114.64(14) |
| C(7)-C(8)-C(9)    | 102.53(13) |
| N(1)-C(9)-C(16)   | 109.30(13) |
| N(1)-C(9)-C(8)    | 103.46(13) |
| C(16)-C(9)-C(8)   | 111.47(14) |
| C(11)-C(10)-C(15) | 117.87(17) |
| C(11)-C(10)-C(8)  | 122.85(16) |
| C(15)-C(10)-C(8)  | 119.27(17) |
| C(10)-C(11)-C(12) | 121.92(18) |
| C(13)-C(12)-C(11) | 119.5(2)   |
| C(14)-C(13)-C(12) | 119.12(18) |
| C(13)-C(14)-C(15) | 120.84(18) |
| C(10)-C(15)-C(14) | 120.77(19) |
| O(2)-C(16)-N(2)   | 122.11(16) |
| O(2)-C(16)-C(9)   | 121.32(15) |
| N(2)-C(16)-C(9)   | 116.57(15) |
| N(2)-C(17)-C(18)  | 112.68(14) |
| N(2)-C(17)-C(25)  | 111.43(13) |
| C(18)-C(17)-C(25) | 112.13(14) |
| C(19)-C(18)-C(17) | 116.64(14) |
| C(20)-C(19)-C(24) | 117.83(16) |
| C(20)-C(19)-C(18) | 123.66(15) |
| C(24)-C(19)-C(18) | 118.52(16) |
| C(21)-C(20)-C(19) | 120.44(16) |
| C(22)-C(21)-C(20) | 120.80(18) |
| C(23)-C(22)-C(21) | 119.79(18) |
| C(22)-C(23)-C(24) | 119.09(17) |
| C(23)-C(24)-C(19) | 122.03(17) |
| O(3)-C(25)-N(3)   | 121.90(16) |
| O(3)-C(25)-C(17)  | 121.47(15) |
| N(3)-C(25)-C(17)  | 116.37(15) |

---

**Torsion angles [deg] with standard deviations for 1.**

---

|                         |             |
|-------------------------|-------------|
| C(9)-N(1)-C(5)-O(1)     | -3.7(2)     |
| C(6)-N(1)-C(5)-O(1)     | -171.75(17) |
| C(9)-N(1)-C(5)-C(4)     | 173.70(15)  |
| C(6)-N(1)-C(5)-C(4)     | 5.6(3)      |
| C(3)-C(4)-C(5)-O(1)     | -138.80(16) |
| C(1)-C(4)-C(5)-O(1)     | -18.6(2)    |
| C(2)-C(4)-C(5)-O(1)     | 97.62(18)   |
| C(3)-C(4)-C(5)-N(1)     | 43.9(2)     |
| C(1)-C(4)-C(5)-N(1)     | 164.04(17)  |
| C(2)-C(4)-C(5)-N(1)     | -79.7(2)    |
| C(5)-N(1)-C(6)-C(7)     | 152.87(17)  |
| C(9)-N(1)-C(6)-C(7)     | -15.9(2)    |
| N(1)-C(6)-C(7)-C(8)     | 34.48(19)   |
| C(6)-C(7)-C(8)-C(10)    | -166.06(15) |
| C(6)-C(7)-C(8)-C(9)     | -39.84(18)  |
| C(5)-N(1)-C(9)-C(16)    | -59.93(19)  |
| C(6)-N(1)-C(9)-C(16)    | 110.13(16)  |
| C(5)-N(1)-C(9)-C(8)     | -178.79(15) |
| C(6)-N(1)-C(9)-C(8)     | -8.73(19)   |
| C(10)-C(8)-C(9)-N(1)    | 157.37(15)  |
| C(7)-C(8)-C(9)-N(1)     | 29.78(17)   |
| C(10)-C(8)-C(9)-C(16)   | 40.0(2)     |
| C(7)-C(8)-C(9)-C(16)    | -87.57(16)  |
| C(7)-C(8)-C(10)-C(11)   | 8.6(3)      |
| C(9)-C(8)-C(10)-C(11)   | -111.3(2)   |
| C(7)-C(8)-C(10)-C(15)   | -170.42(17) |
| C(9)-C(8)-C(10)-C(15)   | 69.6(2)     |
| C(15)-C(10)-C(11)-C(12) | 0.3(3)      |
| C(8)-C(10)-C(11)-C(12)  | -178.77(18) |
| C(10)-C(11)-C(12)-C(13) | -0.6(3)     |
| C(11)-C(12)-C(13)-C(14) | 0.5(3)      |
| C(12)-C(13)-C(14)-C(15) | 0.0(3)      |
| C(11)-C(10)-C(15)-C(14) | 0.2(3)      |
| C(8)-C(10)-C(15)-C(14)  | 179.28(17)  |
| C(13)-C(14)-C(15)-C(10) | -0.3(3)     |
| C(17)-N(2)-C(16)-O(2)   | 0.9(2)      |
| C(17)-N(2)-C(16)-C(9)   | -178.92(14) |
| N(1)-C(9)-C(16)-O(2)    | -49.7(2)    |
| C(8)-C(9)-C(16)-O(2)    | 64.01(19)   |
| N(1)-C(9)-C(16)-N(2)    | 130.07(15)  |
| C(8)-C(9)-C(16)-N(2)    | -116.17(16) |
| C(16)-N(2)-C(17)-C(18)  | -74.78(18)  |

---

|                         |             |
|-------------------------|-------------|
| C(16)-N(2)-C(17)-C(25)  | 52.3(2)     |
| N(2)-C(17)-C(18)-C(19)  | -76.54(18)  |
| C(25)-C(17)-C(18)-C(19) | 156.77(15)  |
| C(17)-C(18)-C(19)-C(20) | -6.4(2)     |
| C(17)-C(18)-C(19)-C(24) | 173.60(15)  |
| C(24)-C(19)-C(20)-C(21) | 1.5(2)      |
| C(18)-C(19)-C(20)-C(21) | -178.48(18) |
| C(19)-C(20)-C(21)-C(22) | -0.8(3)     |
| C(20)-C(21)-C(22)-C(23) | -0.2(3)     |
| C(21)-C(22)-C(23)-C(24) | 0.5(3)      |
| C(22)-C(23)-C(24)-C(19) | 0.2(3)      |
| C(20)-C(19)-C(24)-C(23) | -1.2(3)     |
| C(18)-C(19)-C(24)-C(23) | 178.77(17)  |
| C(26)-N(3)-C(25)-O(3)   | 5.1(2)      |
| C(26)-N(3)-C(25)-C(17)  | 179.29(15)  |
| N(2)-C(17)-C(25)-O(3)   | -151.15(15) |
| C(18)-C(17)-C(25)-O(3)  | -23.8(2)    |
| N(2)-C(17)-C(25)-N(3)   | 34.68(19)   |
| C(18)-C(17)-C(25)-N(3)  | 162.03(15)  |

---

**Dimensions [Å, deg.] of the D-H...A hydrogen bonds for 1.**

---

| D-H...A            | d(D-H) | d(H...A) | d(D...A)   | <(DHA) |
|--------------------|--------|----------|------------|--------|
| N(3)-H(3)...O(1)   | 0.96   | 2.05     | 2.9547(18) | 156.4  |
| N(2)-H(2)...O(3)#1 | 0.94   | 2.03     | 2.9320(17) | 159.5  |

---

Symmetry transformations used to generate equivalent atoms:  
#1 x+1,y,z

Geometrical parameters for the X-ray diffraction structure of  
**Piv-L-cis( $\beta$ Ph)Pro-D-Phe-NHMe (2)**

Bond lengths [Å] with standard deviations for 2.

---

|             |          |
|-------------|----------|
| O(1)-C(5)   | 1.253(4) |
| O(2)-C(16)  | 1.233(4) |
| O(3)-C(25)  | 1.231(4) |
| N(1)-C(5)   | 1.341(4) |
| N(1)-C(6)   | 1.465(4) |
| N(1)-C(9)   | 1.473(4) |
| N(2)-C(16)  | 1.334(4) |
| N(2)-C(17)  | 1.449(4) |
| N(3)-C(25)  | 1.336(4) |
| N(3)-C(26)  | 1.450(4) |
| C(1)-C(4)   | 1.534(4) |
| C(2)-C(4)   | 1.528(5) |
| C(3)-C(4)   | 1.521(4) |
| C(4)-C(5)   | 1.520(4) |
| C(6)-C(7)   | 1.505(5) |
| C(7)-C(8)   | 1.524(4) |
| C(8)-C(10)  | 1.508(4) |
| C(8)-C(9)   | 1.538(5) |
| C(9)-C(16)  | 1.519(4) |
| C(10)-C(11) | 1.386(4) |
| C(10)-C(15) | 1.387(4) |
| C(11)-C(12) | 1.377(5) |
| C(12)-C(13) | 1.389(5) |
| C(13)-C(14) | 1.361(5) |
| C(14)-C(15) | 1.371(5) |
| C(17)-C(18) | 1.521(4) |
| C(17)-C(25) | 1.526(4) |
| C(18)-C(19) | 1.520(4) |
| C(19)-C(20) | 1.371(4) |
| C(19)-C(24) | 1.381(4) |
| C(20)-C(21) | 1.385(5) |
| C(21)-C(22) | 1.369(4) |
| C(22)-C(23) | 1.372(5) |
| C(23)-C(24) | 1.371(4) |

---

**Bond angles [deg] with standard deviations for 2.**

---

|                   |          |
|-------------------|----------|
| C(5)-N(1)-C(6)    | 129.7(3) |
| C(5)-N(1)-C(9)    | 117.6(3) |
| C(6)-N(1)-C(9)    | 111.6(3) |
| C(16)-N(2)-C(17)  | 119.4(3) |
| C(25)-N(3)-C(26)  | 120.9(3) |
| C(5)-C(4)-C(3)    | 116.3(3) |
| C(5)-C(4)-C(2)    | 108.2(3) |
| C(3)-C(4)-C(2)    | 107.2(3) |
| C(5)-C(4)-C(1)    | 107.9(3) |
| C(3)-C(4)-C(1)    | 108.7(3) |
| C(2)-C(4)-C(1)    | 108.4(3) |
| O(1)-C(5)-N(1)    | 118.7(3) |
| O(1)-C(5)-C(4)    | 118.7(3) |
| N(1)-C(5)-C(4)    | 122.5(3) |
| N(1)-C(6)-C(7)    | 103.9(3) |
| C(6)-C(7)-C(8)    | 104.2(3) |
| C(10)-C(8)-C(7)   | 118.4(3) |
| C(10)-C(8)-C(9)   | 114.3(3) |
| C(7)-C(8)-C(9)    | 102.4(3) |
| N(1)-C(9)-C(16)   | 109.3(2) |
| N(1)-C(9)-C(8)    | 103.4(2) |
| C(16)-C(9)-C(8)   | 111.7(3) |
| C(11)-C(10)-C(15) | 117.3(3) |
| C(11)-C(10)-C(8)  | 119.4(3) |
| C(15)-C(10)-C(8)  | 123.3(3) |
| C(12)-C(11)-C(10) | 121.9(4) |
| C(11)-C(12)-C(13) | 119.4(3) |
| C(14)-C(13)-C(12) | 119.2(4) |
| C(13)-C(14)-C(15) | 121.2(4) |
| C(14)-C(15)-C(10) | 121.0(3) |
| O(2)-C(16)-N(2)   | 122.5(3) |
| O(2)-C(16)-C(9)   | 120.4(3) |
| N(2)-C(16)-C(9)   | 117.1(3) |
| N(2)-C(17)-C(18)  | 111.0(3) |
| N(2)-C(17)-C(25)  | 113.1(3) |
| C(18)-C(17)-C(25) | 106.8(3) |
| C(19)-C(18)-C(17) | 116.6(3) |
| C(20)-C(19)-C(24) | 117.8(3) |
| C(20)-C(19)-C(18) | 122.4(3) |
| C(24)-C(19)-C(18) | 119.7(3) |
| C(19)-C(20)-C(21) | 121.3(3) |
| C(22)-C(21)-C(20) | 120.5(3) |
| C(21)-C(22)-C(23) | 118.1(3) |
| C(24)-C(23)-C(22) | 121.5(3) |
| C(23)-C(24)-C(19) | 120.7(3) |
| O(3)-C(25)-N(3)   | 122.5(3) |
| O(3)-C(25)-C(17)  | 120.5(3) |
| N(3)-C(25)-C(17)  | 116.9(3) |

---



**Torsion angles [deg] with standard deviations for 2.**

---

|                         |           |
|-------------------------|-----------|
| C(6)-N(1)-C(5)-O(1)     | -171.4(3) |
| C(9)-N(1)-C(5)-O(1)     | -5.0(4)   |
| C(6)-N(1)-C(5)-C(4)     | 4.6(5)    |
| C(9)-N(1)-C(5)-C(4)     | 170.9(3)  |
| C(3)-C(4)-C(5)-O(1)     | -141.6(3) |
| C(2)-C(4)-C(5)-O(1)     | -20.9(4)  |
| C(1)-C(4)-C(5)-O(1)     | 96.2(3)   |
| C(3)-C(4)-C(5)-N(1)     | 42.4(4)   |
| C(2)-C(4)-C(5)-N(1)     | 163.1(3)  |
| C(1)-C(4)-C(5)-N(1)     | -79.8(4)  |
| C(5)-N(1)-C(6)-C(7)     | 155.2(3)  |
| C(9)-N(1)-C(6)-C(7)     | -11.8(3)  |
| N(1)-C(6)-C(7)-C(8)     | 31.2(3)   |
| C(6)-C(7)-C(8)-C(10)    | -165.3(3) |
| C(6)-C(7)-C(8)-C(9)     | -38.6(3)  |
| C(5)-N(1)-C(9)-C(16)    | -61.8(4)  |
| C(6)-N(1)-C(9)-C(16)    | 106.9(3)  |
| C(5)-N(1)-C(9)-C(8)     | 179.1(3)  |
| C(6)-N(1)-C(9)-C(8)     | -12.1(3)  |
| C(10)-C(8)-C(9)-N(1)    | 160.1(3)  |
| C(7)-C(8)-C(9)-N(1)     | 30.7(3)   |
| C(10)-C(8)-C(9)-C(16)   | 42.7(4)   |
| C(7)-C(8)-C(9)-C(16)    | -86.7(3)  |
| C(7)-C(8)-C(10)-C(11)   | -160.8(3) |
| C(9)-C(8)-C(10)-C(11)   | 78.4(4)   |
| C(7)-C(8)-C(10)-C(15)   | 20.2(5)   |
| C(9)-C(8)-C(10)-C(15)   | -100.6(4) |
| C(15)-C(10)-C(11)-C(12) | 1.9(5)    |
| C(8)-C(10)-C(11)-C(12)  | -177.2(3) |
| C(10)-C(11)-C(12)-C(13) | -1.5(6)   |
| C(11)-C(12)-C(13)-C(14) | 0.0(6)    |
| C(12)-C(13)-C(14)-C(15) | 1.0(6)    |
| C(13)-C(14)-C(15)-C(10) | -0.6(6)   |
| C(11)-C(10)-C(15)-C(14) | -0.9(5)   |
| C(8)-C(10)-C(15)-C(14)  | 178.2(4)  |
| C(17)-N(2)-C(16)-O(2)   | 3.5(5)    |
| C(17)-N(2)-C(16)-C(9)   | -176.8(3) |
| N(1)-C(9)-C(16)-O(2)    | -46.5(4)  |
| C(8)-C(9)-C(16)-O(2)    | 67.2(4)   |
| N(1)-C(9)-C(16)-N(2)    | 133.8(3)  |
| C(8)-C(9)-C(16)-N(2)    | -112.4(3) |
| C(16)-N(2)-C(17)-C(18)  | -178.1(3) |

|                         |           |
|-------------------------|-----------|
| C(16)-N(2)-C(17)-C(25)  | 61.9(4)   |
| N(2)-C(17)-C(18)-C(19)  | 60.5(4)   |
| C(25)-C(17)-C(18)-C(19) | -175.8(3) |
| C(17)-C(18)-C(19)-C(20) | 55.7(4)   |
| C(17)-C(18)-C(19)-C(24) | -126.2(3) |
| C(24)-C(19)-C(20)-C(21) | -1.4(5)   |
| C(18)-C(19)-C(20)-C(21) | 176.7(3)  |
| C(19)-C(20)-C(21)-C(22) | 1.4(5)    |
| C(20)-C(21)-C(22)-C(23) | -0.7(5)   |
| C(21)-C(22)-C(23)-C(24) | 0.2(5)    |
| C(22)-C(23)-C(24)-C(19) | -0.2(5)   |
| C(20)-C(19)-C(24)-C(23) | 0.8(5)    |
| C(18)-C(19)-C(24)-C(23) | -177.3(3) |
| C(26)-N(3)-C(25)-O(3)   | 3.4(5)    |
| C(26)-N(3)-C(25)-C(17)  | 179.2(3)  |
| N(2)-C(17)-C(25)-O(3)   | -158.3(3) |
| C(18)-C(17)-C(25)-O(3)  | 79.3(4)   |
| N(2)-C(17)-C(25)-N(3)   | 25.8(4)   |
| C(18)-C(17)-C(25)-N(3)  | -96.6(3)  |

---

**Dimensions [Å, deg] of the D-H...A hydrogen bonds for 2.**

---

| D-H...A            | d(D-H) | d(H...A) | d(D...A) | <(DHA) |
|--------------------|--------|----------|----------|--------|
| N(3)-H(3)...O(1)   | 1.05   | 1.94     | 2.904(3) | 150.6  |
| N(2)-H(2)...O(3)#1 | 1.03   | 1.92     | 2.915(3) | 162.0  |

---

Symmetry transformations used to generate equivalent atoms:  
#1 x-1,y,z

Geometrical parameters for the X-ray diffraction structure of  
**Piv-L-trans( $\beta$ Ph)Pro-L-Phe-NHMe (3)**

Bond lengths [Å] with standard deviations for 3.

---

**Molecule A**

|             |            |
|-------------|------------|
| O(1)-C(5)   | 1.2321(16) |
| O(2)-C(16)  | 1.2273(15) |
| O(3)-C(25)  | 1.2230(16) |
| N(1)-C(5)   | 1.3548(17) |
| N(1)-C(6)   | 1.4699(17) |
| N(1)-C(9)   | 1.4736(16) |
| N(2)-C(16)  | 1.3431(16) |
| N(2)-C(17)  | 1.4563(16) |
| N(3)-C(25)  | 1.3353(18) |
| N(3)-C(26)  | 1.4508(18) |
| C(1)-C(4)   | 1.525(2)   |
| C(2)-C(4)   | 1.538(2)   |
| C(3)-C(4)   | 1.532(2)   |
| C(4)-C(5)   | 1.544(2)   |
| C(6)-C(7)   | 1.5098(19) |
| C(7)-C(8)   | 1.5261(18) |
| C(8)-C(10)  | 1.5012(19) |
| C(8)-C(9)   | 1.5499(18) |
| C(9)-C(16)  | 1.5239(18) |
| C(10)-C(15) | 1.3857(18) |
| C(10)-C(11) | 1.3919(19) |
| C(11)-C(12) | 1.374(2)   |
| C(12)-C(13) | 1.380(2)   |
| C(13)-C(14) | 1.371(2)   |
| C(14)-C(15) | 1.3819(19) |
| C(17)-C(25) | 1.5340(19) |
| C(17)-C(18) | 1.5438(19) |
| C(18)-C(19) | 1.4989(19) |
| C(19)-C(24) | 1.383(2)   |
| C(19)-C(20) | 1.3846(19) |
| C(20)-C(21) | 1.377(2)   |
| C(21)-C(22) | 1.376(2)   |
| C(22)-C(23) | 1.368(2)   |
| C(23)-C(24) | 1.377(2)   |

**Molecule B**

|               |            |
|---------------|------------|
| O(1')-C(5')   | 1.2323(15) |
| O(2')-C(16')  | 1.2305(15) |
| O(3')-C(25')  | 1.2244(16) |
| N(1')-C(5')   | 1.3532(17) |
| N(1')-C(9')   | 1.4687(16) |
| N(1')-C(6')   | 1.4711(16) |
| N(2')-C(16')  | 1.3448(16) |
| N(2')-C(17')  | 1.4557(15) |
| N(3')-C(25')  | 1.3331(17) |
| N(3')-C(26')  | 1.4467(18) |
| C(1')-C(4')   | 1.530(2)   |
| C(2')-C(4')   | 1.534(2)   |
| C(3')-C(4')   | 1.528(2)   |
| C(4')-C(5')   | 1.5362(19) |
| C(6')-C(7')   | 1.503(2)   |
| C(7')-C(8')   | 1.5335(18) |
| C(8')-C(10')  | 1.5030(19) |
| C(8')-C(9')   | 1.5365(18) |
| C(9')-C(16')  | 1.5192(17) |
| C(10')-C(15') | 1.374(2)   |
| C(10')-C(11') | 1.376(2)   |
| C(11')-C(12') | 1.391(2)   |
| C(12')-C(13') | 1.362(2)   |
| C(13')-C(14') | 1.362(2)   |
| C(14')-C(15') | 1.381(2)   |
| C(17')-C(18') | 1.5316(19) |
| C(17')-C(25') | 1.540(2)   |
| C(18')-C(19') | 1.507(2)   |
| C(19')-C(24') | 1.3799(19) |
| C(19')-C(20') | 1.3850(19) |
| C(20')-C(21') | 1.382(2)   |
| C(21')-C(22') | 1.378(2)   |
| C(22')-C(23') | 1.371(2)   |
| C(23')-C(24') | 1.388(2)   |

---

**Bond angles [deg] with standard deviations for 3.**

---

**Molecule A**

|                   |            |
|-------------------|------------|
| C(5)-N(1)-C(6)    | 130.53(11) |
| C(5)-N(1)-C(9)    | 118.02(11) |
| C(6)-N(1)-C(9)    | 111.42(10) |
| C(16)-N(2)-C(17)  | 122.40(11) |
| C(25)-N(3)-C(26)  | 120.22(12) |
| C(1)-C(4)-C(3)    | 108.91(13) |
| C(1)-C(4)-C(2)    | 107.93(13) |
| C(3)-C(4)-C(2)    | 110.34(13) |
| C(1)-C(4)-C(5)    | 107.19(13) |
| C(3)-C(4)-C(5)    | 110.95(12) |
| C(2)-C(4)-C(5)    | 111.39(12) |
| O(1)-C(5)-N(1)    | 118.45(12) |
| O(1)-C(5)-C(4)    | 120.59(12) |
| N(1)-C(5)-C(4)    | 120.94(13) |
| N(1)-C(6)-C(7)    | 102.83(11) |
| C(6)-C(7)-C(8)    | 102.61(11) |
| C(10)-C(8)-C(7)   | 116.01(11) |
| C(10)-C(8)-C(9)   | 115.80(11) |
| C(7)-C(8)-C(9)    | 101.86(10) |
| N(1)-C(9)-C(16)   | 110.54(10) |
| N(1)-C(9)-C(8)    | 102.88(10) |
| C(16)-C(9)-C(8)   | 110.08(10) |
| C(15)-C(10)-C(11) | 117.95(13) |
| C(15)-C(10)-C(8)  | 119.38(12) |
| C(11)-C(10)-C(8)  | 122.64(12) |
| C(12)-C(11)-C(10) | 120.88(13) |
| C(11)-C(12)-C(13) | 120.51(14) |
| C(14)-C(13)-C(12) | 119.23(14) |
| C(13)-C(14)-C(15) | 120.54(13) |
| C(14)-C(15)-C(10) | 120.85(13) |
| O(2)-C(16)-N(2)   | 123.28(12) |
| O(2)-C(16)-C(9)   | 120.70(12) |
| N(2)-C(16)-C(9)   | 115.97(12) |
| N(2)-C(17)-C(25)  | 114.38(11) |
| N(2)-C(17)-C(18)  | 113.45(11) |
| C(25)-C(17)-C(18) | 111.88(11) |
| C(19)-C(18)-C(17) | 113.58(11) |
| C(24)-C(19)-C(20) | 117.46(13) |
| C(24)-C(19)-C(18) | 121.54(13) |
| C(20)-C(19)-C(18) | 120.98(13) |
| C(21)-C(20)-C(19) | 121.64(14) |
| C(22)-C(21)-C(20) | 119.66(15) |

|                   |            |
|-------------------|------------|
| C(23)-C(22)-C(21) | 119.70(16) |
| C(22)-C(23)-C(24) | 120.31(15) |
| C(23)-C(24)-C(19) | 121.22(14) |
| O(3)-C(25)-N(3)   | 122.52(13) |
| O(3)-C(25)-C(17)  | 119.88(13) |
| N(3)-C(25)-C(17)  | 117.35(12) |

**Molecule B**

|                      |            |
|----------------------|------------|
| C(5')-N(1')-C(9')    | 117.88(10) |
| C(5')-N(1')-C(6')    | 130.70(11) |
| C(9')-N(1')-C(6')    | 111.26(10) |
| C(16')-N(2')-C(17')  | 122.29(11) |
| C(25')-N(3')-C(26')  | 121.65(12) |
| C(3')-C(4')-C(1')    | 108.83(13) |
| C(3')-C(4')-C(2')    | 110.22(13) |
| C(1')-C(4')-C(2')    | 107.66(13) |
| C(3')-C(4')-C(5')    | 110.96(12) |
| C(1')-C(4')-C(5')    | 107.73(12) |
| C(2')-C(4')-C(5')    | 111.33(11) |
| O(1')-C(5')-N(1')    | 118.46(12) |
| O(1')-C(5')-C(4')    | 120.55(12) |
| N(1')-C(5')-C(4')    | 120.97(11) |
| N(1')-C(6')-C(7')    | 102.55(10) |
| C(6')-C(7')-C(8')    | 102.90(10) |
| C(10')-C(8')-C(7')   | 114.17(10) |
| C(10')-C(8')-C(9')   | 118.20(11) |
| C(7')-C(8')-C(9')    | 101.28(10) |
| N(1')-C(9')-C(16')   | 110.11(10) |
| N(1')-C(9')-C(8')    | 103.51(10) |
| C(16')-C(9')-C(8')   | 111.33(11) |
| C(15')-C(10')-C(11') | 117.55(14) |
| C(15')-C(10')-C(8')  | 118.05(13) |
| C(11')-C(10')-C(8')  | 124.33(13) |
| C(10')-C(11')-C(12') | 120.57(14) |
| C(13')-C(12')-C(11') | 121.02(15) |
| C(14')-C(13')-C(12') | 118.73(15) |
| C(13')-C(14')-C(15') | 120.56(17) |
| C(10')-C(15')-C(14') | 121.54(16) |
| O(2')-C(16')-N(2')   | 122.98(11) |
| O(2')-C(16')-C(9')   | 121.64(11) |
| N(2')-C(16')-C(9')   | 115.35(12) |
| N(2')-C(17')-C(18')  | 112.48(10) |
| N(2')-C(17')-C(25')  | 112.74(11) |
| C(18')-C(17')-C(25') | 111.66(11) |
| C(19')-C(18')-C(17') | 114.42(11) |

|                      |            |
|----------------------|------------|
| C(24')-C(19')-C(20') | 118.49(13) |
| C(24')-C(19')-C(18') | 121.28(13) |
| C(20')-C(19')-C(18') | 120.14(12) |
| C(21')-C(20')-C(19') | 120.94(14) |
| C(22')-C(21')-C(20') | 119.94(14) |
| C(23')-C(22')-C(21') | 119.73(15) |
| C(22')-C(23')-C(24') | 120.24(14) |
| C(19')-C(24')-C(23') | 120.64(14) |
| O(3')-C(25')-N(3')   | 123.46(13) |
| O(3')-C(25')-C(17')  | 119.87(12) |
| N(3')-C(25')-C(17')  | 116.47(12) |

---

**Torsion angles [deg] with standard deviations for 3.**

---

**Molecule A**

|                         |             |
|-------------------------|-------------|
| C(6)-N(1)-C(5)-O(1)     | 178.11(13)  |
| C(9)-N(1)-C(5)-O(1)     | -3.92(17)   |
| C(6)-N(1)-C(5)-C(4)     | -3.2(2)     |
| C(9)-N(1)-C(5)-C(4)     | 174.72(12)  |
| C(1)-C(4)-C(5)-O(1)     | 5.88(18)    |
| C(3)-C(4)-C(5)-O(1)     | 124.68(14)  |
| C(2)-C(4)-C(5)-O(1)     | -111.98(15) |
| C(1)-C(4)-C(5)-N(1)     | -172.73(12) |
| C(3)-C(4)-C(5)-N(1)     | -53.94(17)  |
| C(2)-C(4)-C(5)-N(1)     | 69.41(17)   |
| C(5)-N(1)-C(6)-C(7)     | -163.72(13) |
| C(9)-N(1)-C(6)-C(7)     | 18.21(15)   |
| N(1)-C(6)-C(7)-C(8)     | -37.52(15)  |
| C(6)-C(7)-C(8)-C(10)    | 169.38(12)  |
| C(6)-C(7)-C(8)-C(9)     | 42.70(14)   |
| C(5)-N(1)-C(9)-C(16)    | -52.52(15)  |
| C(6)-N(1)-C(9)-C(16)    | 125.82(12)  |
| C(5)-N(1)-C(9)-C(8)     | -170.03(11) |
| C(6)-N(1)-C(9)-C(8)     | 8.31(14)    |
| C(10)-C(8)-C(9)-N(1)    | -157.92(10) |
| C(7)-C(8)-C(9)-N(1)     | -31.11(13)  |
| C(10)-C(8)-C(9)-C(16)   | 84.24(14)   |
| C(7)-C(8)-C(9)-C(16)    | -148.94(11) |
| C(7)-C(8)-C(10)-C(15)   | 131.26(13)  |
| C(9)-C(8)-C(10)-C(15)   | -109.41(14) |
| C(7)-C(8)-C(10)-C(11)   | -46.70(19)  |
| C(9)-C(8)-C(10)-C(11)   | 72.64(17)   |
| C(15)-C(10)-C(11)-C(12) | -2.1(2)     |
| C(8)-C(10)-C(11)-C(12)  | 175.91(13)  |
| C(10)-C(11)-C(12)-C(13) | 1.3(2)      |
| C(11)-C(12)-C(13)-C(14) | 0.7(2)      |
| C(12)-C(13)-C(14)-C(15) | -1.8(2)     |
| C(13)-C(14)-C(15)-C(10) | 1.0(2)      |
| C(11)-C(10)-C(15)-C(14) | 0.91(19)    |
| C(8)-C(10)-C(15)-C(14)  | -177.14(12) |
| C(17)-N(2)-C(16)-O(2)   | 1.62(19)    |
| C(17)-N(2)-C(16)-C(9)   | 179.07(11)  |
| N(1)-C(9)-C(16)-O(2)    | -50.27(16)  |
| C(8)-C(9)-C(16)-O(2)    | 62.72(15)   |
| N(1)-C(9)-C(16)-N(2)    | 132.21(11)  |
| C(8)-C(9)-C(16)-N(2)    | -114.80(12) |
| C(16)-N(2)-C(17)-C(25)  | 63.56(16)   |
| C(16)-N(2)-C(17)-C(18)  | -66.42(16)  |
| N(2)-C(17)-C(18)-C(19)  | -90.17(14)  |
| C(25)-C(17)-C(18)-C(19) | 138.60(12)  |
| C(17)-C(18)-C(19)-C(24) | 94.09(16)   |



|                         |             |
|-------------------------|-------------|
| C(17)-C(18)-C(19)-C(20) | -87.63(16)  |
| C(24)-C(19)-C(20)-C(21) | 0.4(2)      |
| C(18)-C(19)-C(20)-C(21) | -178.00(14) |
| C(19)-C(20)-C(21)-C(22) | 0.6(2)      |
| C(20)-C(21)-C(22)-C(23) | -1.1(2)     |
| C(21)-C(22)-C(23)-C(24) | 0.7(3)      |
| C(22)-C(23)-C(24)-C(19) | 0.3(3)      |
| C(20)-C(19)-C(24)-C(23) | -0.8(2)     |
| C(18)-C(19)-C(24)-C(23) | 177.56(14)  |
| C(26)-N(3)-C(25)-O(3)   | 3.9(2)      |
| C(26)-N(3)-C(25)-C(17)  | 178.02(12)  |
| N(2)-C(17)-C(25)-O(3)   | -166.23(12) |
| C(18)-C(17)-C(25)-O(3)  | -35.48(18)  |
| N(2)-C(17)-C(25)-N(3)   | 19.44(17)   |
| C(18)-C(17)-C(25)-N(3)  | 150.20(12)  |

### Molecule B

|                             |             |
|-----------------------------|-------------|
| C(9')-N(1')-C(5')-O(1')     | -3.50(17)   |
| C(6')-N(1')-C(5')-O(1')     | 171.54(12)  |
| C(9')-N(1')-C(5')-C(4')     | 174.82(11)  |
| C(6')-N(1')-C(5')-C(4')     | -10.1(2)    |
| C(3')-C(4')-C(5')-O(1')     | 127.23(14)  |
| C(1')-C(4')-C(5')-O(1')     | 8.20(18)    |
| C(2')-C(4')-C(5')-O(1')     | -109.62(14) |
| C(3')-C(4')-C(5')-N(1')     | -51.05(17)  |
| C(1')-C(4')-C(5')-N(1')     | -170.08(12) |
| C(2')-C(4')-C(5')-N(1')     | 72.10(16)   |
| C(5')-N(1')-C(6')-C(7')     | -157.45(13) |
| C(9')-N(1')-C(6')-C(7')     | 17.84(14)   |
| N(1')-C(6')-C(7')-C(8')     | -37.35(13)  |
| C(6')-C(7')-C(8')-C(10')    | 171.01(11)  |
| C(6')-C(7')-C(8')-C(9')     | 42.87(13)   |
| C(5')-N(1')-C(9')-C(16')    | -55.99(14)  |
| C(6')-N(1')-C(9')-C(16')    | 128.05(11)  |
| C(5')-N(1')-C(9')-C(8')     | -175.09(11) |
| C(6')-N(1')-C(9')-C(8')     | 8.95(14)    |
| C(10')-C(8')-C(9')-N(1')    | -156.88(11) |
| C(7')-C(8')-C(9')-N(1')     | -31.39(12)  |
| C(10')-C(8')-C(9')-C(16')   | 84.86(14)   |
| C(7')-C(8')-C(9')-C(16')    | -149.65(11) |
| C(7')-C(8')-C(10')-C(15')   | 88.85(16)   |
| C(9')-C(8')-C(10')-C(15')   | -152.21(14) |
| C(7')-C(8')-C(10')-C(11')   | -88.26(16)  |
| C(9')-C(8')-C(10')-C(11')   | 30.68(19)   |
| C(15')-C(10')-C(11')-C(12') | 0.1(2)      |
| C(8')-C(10')-C(11')-C(12')  | 177.19(13)  |
| C(10')-C(11')-C(12')-C(13') | -1.2(2)     |
| C(11')-C(12')-C(13')-C(14') | 1.0(2)      |
| C(12')-C(13')-C(14')-C(15') | 0.2(3)      |
| C(11')-C(10')-C(15')-C(14') | 1.2(2)      |
| C(8')-C(10')-C(15')-C(14')  | -176.14(16) |

|                             |             |
|-----------------------------|-------------|
| C(13')-C(14')-C(15')-C(10') | -1.3(3)     |
| C(17')-N(2')-C(16')-O(2')   | 2.24(18)    |
| C(17')-N(2')-C(16')-C(9')   | -179.70(11) |
| N(1')-C(9')-C(16')-O(2')    | -46.92(16)  |
| C(8')-C(9')-C(16')-O(2')    | 67.30(15)   |
| N(1')-C(9')-C(16')-N(2')    | 134.99(11)  |
| C(8')-C(9')-C(16')-N(2')    | -110.79(12) |
| C(16')-N(2')-C(17')-C(18')  | -67.40(15)  |
| C(16')-N(2')-C(17')-C(25')  | 59.95(15)   |
| N(2')-C(17')-C(18')-C(19')  | -73.77(15)  |
| C(25')-C(17')-C(18')-C(19') | 158.31(11)  |
| C(17')-C(18')-C(19')-C(24') | 89.82(16)   |
| C(17')-C(18')-C(19')-C(20') | -93.65(15)  |
| C(24')-C(19')-C(20')-C(21') | 1.3(2)      |
| C(18')-C(19')-C(20')-C(21') | -175.33(14) |
| C(19')-C(20')-C(21')-C(22') | -0.8(2)     |
| C(20')-C(21')-C(22')-C(23') | -0.1(2)     |
| C(21')-C(22')-C(23')-C(24') | 0.6(2)      |
| C(20')-C(19')-C(24')-C(23') | -0.8(2)     |
| C(18')-C(19')-C(24')-C(23') | 175.79(13)  |
| C(22')-C(23')-C(24')-C(19') | -0.2(2)     |
| C(26')-N(3')-C(25')-O(3')   | 6.7(2)      |
| C(26')-N(3')-C(25')-C(17')  | -178.56(12) |
| N(2')-C(17')-C(25')-O(3')   | -160.39(12) |
| C(18')-C(17')-C(25')-O(3')  | -32.61(18)  |
| N(2')-C(17')-C(25')-N(3')   | 24.62(17)   |
| C(18')-C(17')-C(25')-N(3')  | 152.40(12)  |

---

**Dimensions [Å, deg] of the D-H...A hydrogen bonds for 3.**

---

| D-H...A             | d(D-H) | d(H...A) | d(D...A)   | <(DHA) |
|---------------------|--------|----------|------------|--------|
| N(3)-H(3)...O(1)    | 0.88   | 2.03     | 2.8848(15) | 161.3  |
| N(3')-H(3')...O(1') | 0.88   | 2.05     | 2.8773(14) | 156.5  |
| N(2')-H(2')...O(2)  | 0.84   | 2.31     | 3.1352(14) | 169.3  |
| N(2)-H(2)...O(2')#1 | 0.87   | 2.17     | 3.0319(13) | 167.4  |

---

Symmetry transformations used to generate equivalent atoms:  
#1 x-1,y,z

**Geometrical parameters for the X-ray diffraction structure of  
Piv-L-trans( $\beta$ Ph)Pro-D-Phe-NHMe (4)**

**Bond lengths [Å] with standard deviations for 4.**

---

**Molecule A**

|             |          |
|-------------|----------|
| O(1)-C(5)   | 1.234(3) |
| O(2)-C(16)  | 1.233(3) |
| O(3)-C(25)  | 1.223(3) |
| N(1)-C(5)   | 1.351(3) |
| N(1)-C(9)   | 1.471(3) |
| N(1)-C(6)   | 1.485(3) |
| N(2)-C(16)  | 1.335(3) |
| N(2)-C(17)  | 1.461(3) |
| N(3)-C(25)  | 1.327(4) |
| N(3)-C(26)  | 1.451(3) |
| C(1)-C(4)   | 1.522(4) |
| C(2)-C(4)   | 1.522(4) |
| C(3)-C(4)   | 1.534(4) |
| C(4)-C(5)   | 1.533(4) |
| C(6)-C(7)   | 1.520(4) |
| C(7)-C(8)   | 1.520(4) |
| C(8)-C(10)  | 1.511(4) |
| C(8)-C(9)   | 1.534(3) |
| C(9)-C(16)  | 1.521(4) |
| C(10)-C(11) | 1.383(4) |
| C(10)-C(15) | 1.385(4) |
| C(11)-C(12) | 1.387(5) |
| C(12)-C(13) | 1.375(5) |
| C(13)-C(14) | 1.369(4) |
| C(14)-C(15) | 1.385(4) |
| C(17)-C(18) | 1.531(4) |
| C(17)-C(25) | 1.541(3) |
| C(18)-C(19) | 1.509(4) |
| C(19)-C(24) | 1.384(4) |
| C(19)-C(20) | 1.385(4) |
| C(20)-C(21) | 1.379(4) |
| C(21)-C(22) | 1.380(5) |
| C(22)-C(23) | 1.374(4) |
| C(23)-C(24) | 1.390(4) |

**Molecule B**

|               |          |
|---------------|----------|
| O(1')-C(5')   | 1.232(3) |
| O(2')-C(16')  | 1.233(3) |
| O(3')-C(25')  | 1.227(3) |
| N(1')-C(5')   | 1.350(3) |
| N(1')-C(6')   | 1.467(3) |
| N(1')-C(9')   | 1.469(3) |
| N(2')-C(16')  | 1.339(3) |
| N(2')-C(17')  | 1.455(3) |
| N(3')-C(25')  | 1.333(4) |
| N(3')-C(26')  | 1.462(4) |
| C(1')-C(4')   | 1.529(4) |
| C(2')-C(4')   | 1.531(4) |
| C(3')-C(4')   | 1.529(4) |
| C(4')-C(5')   | 1.542(4) |
| C(6')-C(7')   | 1.513(4) |
| C(7')-C(8')   | 1.523(4) |
| C(8')-C(10')  | 1.515(4) |
| C(8')-C(9')   | 1.550(3) |
| C(9')-C(16')  | 1.525(3) |
| C(10')-C(15') | 1.356(5) |
| C(10')-C(11') | 1.387(4) |
| C(11')-C(12') | 1.385(5) |
| C(12')-C(13') | 1.348(6) |
| C(13')-C(14') | 1.342(6) |
| C(14')-C(15') | 1.400(5) |
| C(17')-C(18') | 1.536(4) |
| C(17')-C(25') | 1.537(4) |
| C(18')-C(19') | 1.511(4) |
| C(19')-C(24') | 1.380(4) |
| C(19')-C(20') | 1.386(4) |
| C(20')-C(21') | 1.380(5) |
| C(21')-C(22') | 1.387(4) |
| C(22')-C(23') | 1.386(4) |
| C(23')-C(24') | 1.378(4) |

---

**Bond angles [deg] with standard deviations for 4.**

---

**Molecule A**

|                   |            |
|-------------------|------------|
| C(5)-N(1)-C(9)    | 118.3(2)   |
| C(5)-N(1)-C(6)    | 130.3(2)   |
| C(9)-N(1)-C(6)    | 110.6(2)   |
| C(16)-N(2)-C(17)  | 122.92(19) |
| C(25)-N(3)-C(26)  | 121.7(2)   |
| C(2)-C(4)-C(1)    | 108.2(3)   |
| C(2)-C(4)-C(5)    | 107.8(3)   |
| C(1)-C(4)-C(5)    | 112.1(2)   |
| C(2)-C(4)-C(3)    | 108.5(3)   |
| C(1)-C(4)-C(3)    | 109.7(3)   |
| C(5)-C(4)-C(3)    | 110.4(2)   |
| O(1)-C(5)-N(1)    | 118.3(3)   |
| O(1)-C(5)-C(4)    | 120.2(2)   |
| N(1)-C(5)-C(4)    | 121.5(3)   |
| N(1)-C(6)-C(7)    | 102.8(2)   |
| C(8)-C(7)-C(6)    | 102.1(2)   |
| C(10)-C(8)-C(7)   | 120.1(2)   |
| C(10)-C(8)-C(9)   | 112.2(2)   |
| C(7)-C(8)-C(9)    | 102.1(2)   |
| N(1)-C(9)-C(16)   | 112.7(2)   |
| N(1)-C(9)-C(8)    | 103.3(2)   |
| C(16)-C(9)-C(8)   | 111.1(2)   |
| C(11)-C(10)-C(15) | 117.9(3)   |
| C(11)-C(10)-C(8)  | 122.6(3)   |
| C(15)-C(10)-C(8)  | 119.3(2)   |
| C(10)-C(11)-C(12) | 121.0(3)   |
| C(13)-C(12)-C(11) | 119.7(3)   |
| C(14)-C(13)-C(12) | 120.4(3)   |
| C(13)-C(14)-C(15) | 119.6(3)   |
| C(14)-C(15)-C(10) | 121.4(3)   |
| O(2)-C(16)-N(2)   | 123.6(2)   |
| O(2)-C(16)-C(9)   | 120.7(2)   |
| N(2)-C(16)-C(9)   | 115.7(2)   |
| N(2)-C(17)-C(18)  | 109.76(19) |
| N(2)-C(17)-C(25)  | 113.4(2)   |
| C(18)-C(17)-C(25) | 109.8(2)   |
| C(19)-C(18)-C(17) | 116.0(2)   |
| C(24)-C(19)-C(20) | 117.6(3)   |
| C(24)-C(19)-C(18) | 120.6(2)   |
| C(20)-C(19)-C(18) | 121.8(3)   |
| C(21)-C(20)-C(19) | 121.2(3)   |

|                   |          |
|-------------------|----------|
| C(20)-C(21)-C(22) | 120.6(3) |
| C(23)-C(22)-C(21) | 118.9(3) |
| C(22)-C(23)-C(24) | 120.3(3) |
| C(19)-C(24)-C(23) | 121.3(3) |
| O(3)-C(25)-N(3)   | 123.8(3) |
| O(3)-C(25)-C(17)  | 118.8(3) |
| N(3)-C(25)-C(17)  | 117.4(2) |

**Molecule B**

|                      |            |
|----------------------|------------|
| C(5')-N(1')-C(6')    | 129.9(2)   |
| C(5')-N(1')-C(9')    | 118.11(19) |
| C(6')-N(1')-C(9')    | 112.0(2)   |
| C(16')-N(2')-C(17')  | 123.5(2)   |
| C(25')-N(3')-C(26')  | 120.6(2)   |
| C(3')-C(4')-C(1')    | 111.3(2)   |
| C(3')-C(4')-C(2')    | 107.5(2)   |
| C(1')-C(4')-C(2')    | 108.1(2)   |
| C(3')-C(4')-C(5')    | 113.6(2)   |
| C(1')-C(4')-C(5')    | 109.2(2)   |
| C(2')-C(4')-C(5')    | 106.9(2)   |
| O(1')-C(5')-N(1')    | 119.0(2)   |
| O(1')-C(5')-C(4')    | 119.7(2)   |
| N(1')-C(5')-C(4')    | 121.2(2)   |
| N(1')-C(6')-C(7')    | 103.2(2)   |
| C(6')-C(7')-C(8')    | 105.9(2)   |
| C(10')-C(8')-C(7')   | 115.8(2)   |
| C(10')-C(8')-C(9')   | 113.12(19) |
| C(7')-C(8')-C(9')    | 103.4(2)   |
| N(1')-C(9')-C(16')   | 111.2(2)   |
| N(1')-C(9')-C(8')    | 105.0(2)   |
| C(16')-C(9')-C(8')   | 110.1(2)   |
| C(15')-C(10')-C(11') | 116.7(3)   |
| C(15')-C(10')-C(8')  | 120.6(3)   |
| C(11')-C(10')-C(8')  | 122.8(3)   |
| C(12')-C(11')-C(10') | 121.6(4)   |
| C(13')-C(12')-C(11') | 120.1(4)   |
| C(14')-C(13')-C(12') | 119.7(4)   |
| C(13')-C(14')-C(15') | 120.6(4)   |
| C(10')-C(15')-C(14') | 121.3(4)   |
| O(2')-C(16')-N(2')   | 123.4(2)   |
| O(2')-C(16')-C(9')   | 121.6(2)   |
| N(2')-C(16')-C(9')   | 114.9(2)   |
| N(2')-C(17')-C(18')  | 110.6(2)   |
| N(2')-C(17')-C(25')  | 113.7(2)   |
| C(18')-C(17')-C(25') | 109.0(2)   |

|                      |          |
|----------------------|----------|
| C(19')-C(18')-C(17') | 115.2(2) |
| C(24')-C(19')-C(20') | 118.2(3) |
| C(24')-C(19')-C(18') | 120.6(3) |
| C(20')-C(19')-C(18') | 121.2(3) |
| C(21')-C(20')-C(19') | 120.5(3) |
| C(20')-C(21')-C(22') | 120.9(3) |
| C(23')-C(22')-C(21') | 118.6(3) |
| C(24')-C(23')-C(22') | 120.0(3) |
| C(23')-C(24')-C(19') | 121.8(3) |
| O(3')-C(25')-N(3')   | 123.7(3) |
| O(3')-C(25')-C(17')  | 119.9(3) |
| N(3')-C(25')-C(17')  | 116.4(2) |

---

**Torsion angles [deg] with standard deviations for 4.**

---

**Molecule A**

|                         |           |
|-------------------------|-----------|
| C(9)-N(1)-C(5)-O(1)     | 1.0(3)    |
| C(6)-N(1)-C(5)-O(1)     | 169.5(2)  |
| C(9)-N(1)-C(5)-C(4)     | -179.3(2) |
| C(6)-N(1)-C(5)-C(4)     | -10.8(4)  |
| C(2)-C(4)-C(5)-O(1)     | 11.9(3)   |
| C(1)-C(4)-C(5)-O(1)     | 130.9(3)  |
| C(3)-C(4)-C(5)-O(1)     | -106.5(3) |
| C(2)-C(4)-C(5)-N(1)     | -167.8(2) |
| C(1)-C(4)-C(5)-N(1)     | -48.8(3)  |
| C(3)-C(4)-C(5)-N(1)     | 73.8(3)   |
| C(5)-N(1)-C(6)-C(7)     | -153.3(2) |
| C(9)-N(1)-C(6)-C(7)     | 16.0(3)   |
| N(1)-C(6)-C(7)-C(8)     | -36.6(3)  |
| C(6)-C(7)-C(8)-C(10)    | 168.5(2)  |
| C(6)-C(7)-C(8)-C(9)     | 43.6(2)   |
| C(5)-N(1)-C(9)-C(16)    | -58.3(3)  |
| C(6)-N(1)-C(9)-C(16)    | 131.0(2)  |
| C(5)-N(1)-C(9)-C(8)     | -178.3(2) |
| C(6)-N(1)-C(9)-C(8)     | 11.0(2)   |
| C(10)-C(8)-C(9)-N(1)    | -163.6(2) |
| C(7)-C(8)-C(9)-N(1)     | -33.6(2)  |
| C(10)-C(8)-C(9)-C(16)   | 75.4(3)   |
| C(7)-C(8)-C(9)-C(16)    | -154.6(2) |
| C(7)-C(8)-C(10)-C(11)   | -25.3(4)  |
| C(9)-C(8)-C(10)-C(11)   | 94.6(3)   |
| C(7)-C(8)-C(10)-C(15)   | 159.0(3)  |
| C(9)-C(8)-C(10)-C(15)   | -81.0(3)  |
| C(15)-C(10)-C(11)-C(12) | -0.2(4)   |
| C(8)-C(10)-C(11)-C(12)  | -175.9(3) |
| C(10)-C(11)-C(12)-C(13) | 1.0(5)    |
| C(11)-C(12)-C(13)-C(14) | -0.7(5)   |
| C(12)-C(13)-C(14)-C(15) | -0.4(5)   |
| C(13)-C(14)-C(15)-C(10) | 1.2(5)    |
| C(11)-C(10)-C(15)-C(14) | -0.9(4)   |
| C(8)-C(10)-C(15)-C(14)  | 174.9(3)  |
| C(17)-N(2)-C(16)-O(2)   | 2.7(4)    |
| C(17)-N(2)-C(16)-C(9)   | -179.6(2) |
| N(1)-C(9)-C(16)-O(2)    | -54.5(3)  |
| C(8)-C(9)-C(16)-O(2)    | 60.9(3)   |
| N(1)-C(9)-C(16)-N(2)    | 127.7(2)  |
| C(8)-C(9)-C(16)-N(2)    | -116.9(2) |
| C(16)-N(2)-C(17)-C(18)  | -165.4(2) |
| C(16)-N(2)-C(17)-C(25)  | 71.5(3)   |
| N(2)-C(17)-C(18)-C(19)  | 71.6(3)   |
| C(25)-C(17)-C(18)-C(19) | -163.2(2) |
| C(17)-C(18)-C(19)-C(24) | 73.1(3)   |



|                         |           |
|-------------------------|-----------|
| C(17)-C(18)-C(19)-C(20) | -109.2(3) |
| C(24)-C(19)-C(20)-C(21) | 1.0(5)    |
| C(18)-C(19)-C(20)-C(21) | -176.8(3) |
| C(19)-C(20)-C(21)-C(22) | 0.5(5)    |
| C(20)-C(21)-C(22)-C(23) | -1.6(5)   |
| C(21)-C(22)-C(23)-C(24) | 1.2(5)    |
| C(20)-C(19)-C(24)-C(23) | -1.3(4)   |
| C(18)-C(19)-C(24)-C(23) | 176.5(3)  |
| C(22)-C(23)-C(24)-C(19) | 0.3(5)    |
| C(26)-N(3)-C(25)-O(3)   | 5.8(4)    |
| C(26)-N(3)-C(25)-C(17)  | -175.5(2) |
| N(2)-C(17)-C(25)-O(3)   | -176.2(2) |
| C(18)-C(17)-C(25)-O(3)  | 60.7(3)   |
| N(2)-C(17)-C(25)-N(3)   | 5.0(3)    |
| C(18)-C(17)-C(25)-N(3)  | -118.1(3) |

#### Molecule B

|                             |           |
|-----------------------------|-----------|
| C(6')-N(1')-C(5')-O(1')     | -172.5(2) |
| C(9')-N(1')-C(5')-O(1')     | 5.6(3)    |
| C(6')-N(1')-C(5')-C(4')     | 5.1(4)    |
| C(9')-N(1')-C(5')-C(4')     | -176.8(2) |
| C(3')-C(4')-C(5')-O(1')     | -134.8(2) |
| C(1')-C(4')-C(5')-O(1')     | 100.3(3)  |
| C(2')-C(4')-C(5')-O(1')     | -16.4(3)  |
| C(3')-C(4')-C(5')-N(1')     | 47.6(3)   |
| C(1')-C(4')-C(5')-N(1')     | -77.3(3)  |
| C(2')-C(4')-C(5')-N(1')     | 166.0(2)  |
| C(5')-N(1')-C(6')-C(7')     | 159.0(3)  |
| C(9')-N(1')-C(6')-C(7')     | -19.3(3)  |
| N(1')-C(6')-C(7')-C(8')     | 31.3(3)   |
| C(6')-C(7')-C(8')-C(10')    | 92.8(3)   |
| C(6')-C(7')-C(8')-C(9')     | -31.5(3)  |
| C(5')-N(1')-C(9')-C(16')    | -59.6(3)  |
| C(6')-N(1')-C(9')-C(16')    | 118.8(2)  |
| C(5')-N(1')-C(9')-C(8')     | -178.6(2) |
| C(6')-N(1')-C(9')-C(8')     | -0.1(3)   |
| C(10')-C(8')-C(9')-N(1')    | -106.6(3) |
| C(7')-C(8')-C(9')-N(1')     | 19.4(3)   |
| C(10')-C(8')-C(9')-C(16')   | 133.7(2)  |
| C(7')-C(8')-C(9')-C(16')    | -100.3(3) |
| C(7')-C(8')-C(10')-C(15')   | 141.8(3)  |
| C(9')-C(8')-C(10')-C(15')   | -99.1(4)  |
| C(7')-C(8')-C(10')-C(11')   | -37.5(4)  |
| C(9')-C(8')-C(10')-C(11')   | 81.5(3)   |
| C(15')-C(10')-C(11')-C(12') | 2.4(5)    |
| C(8')-C(10')-C(11')-C(12')  | -178.2(3) |
| C(10')-C(11')-C(12')-C(13') | -0.8(5)   |
| C(11')-C(12')-C(13')-C(14') | -1.3(6)   |
| C(12')-C(13')-C(14')-C(15') | 1.8(7)    |
| C(11')-C(10')-C(15')-C(14') | -2.0(6)   |
| C(8')-C(10')-C(15')-C(14')  | 178.7(4)  |

|                             |           |
|-----------------------------|-----------|
| C(13')-C(14')-C(15')-C(10') | -0.1(7)   |
| C(17')-N(2')-C(16')-O(2')   | 3.5(4)    |
| C(17')-N(2')-C(16')-C(9')   | 179.8(2)  |
| N(1')-C(9')-C(16')-O(2')    | -55.9(3)  |
| C(8')-C(9')-C(16')-O(2')    | 60.0(3)   |
| N(1')-C(9')-C(16')-N(2')    | 127.7(2)  |
| C(8')-C(9')-C(16')-N(2')    | -116.4(2) |
| C(16')-N(2')-C(17')-C(18')  | -146.3(2) |
| C(16')-N(2')-C(17')-C(25')  | 90.6(3)   |
| N(2')-C(17')-C(18')-C(19')  | 61.1(3)   |
| C(25')-C(17')-C(18')-C(19') | -173.2(2) |
| C(17')-C(18')-C(19')-C(24') | 99.6(3)   |
| C(17')-C(18')-C(19')-C(20') | -81.9(3)  |
| C(24')-C(19')-C(20')-C(21') | -0.4(4)   |
| C(18')-C(19')-C(20')-C(21') | -178.9(3) |
| C(19')-C(20')-C(21')-C(22') | -0.4(5)   |
| C(20')-C(21')-C(22')-C(23') | 0.7(5)    |
| C(21')-C(22')-C(23')-C(24') | -0.3(4)   |
| C(22')-C(23')-C(24')-C(19') | -0.5(4)   |
| C(20')-C(19')-C(24')-C(23') | 0.8(4)    |
| C(18')-C(19')-C(24')-C(23') | 179.3(2)  |
| C(26')-N(3')-C(25')-O(3')   | 2.3(4)    |
| C(26')-N(3')-C(25')-C(17')  | -177.7(2) |
| N(2')-C(17')-C(25')-O(3')   | 169.0(2)  |
| C(18')-C(17')-C(25')-O(3')  | 45.1(3)   |
| N(2')-C(17')-C(25')-N(3')   | -11.0(3)  |
| C(18')-C(17')-C(25')-N(3')  | -134.9(2) |

---

**Dimensions [Å, deg] of the D-H...A hydrogen bonds for 4.**

---

| D-H...A              | d(D-H) | d(H...A) | d(D...A) | <(DHA) |
|----------------------|--------|----------|----------|--------|
| N(3)-H(3)...O(1)     | 0.99   | 1.93     | 2.880(3) | 158.7  |
| N(3')-H(3')...O(1')  | 0.95   | 1.95     | 2.856(3) | 158.4  |
| N(2)-H(2)...O(2')    | 0.93   | 2.05     | 2.965(2) | 168.6  |
| N(2')-H(2')...O(2)#1 | 0.91   | 2.03     | 2.934(2) | 171.5  |

---

Symmetry transformations used to generate equivalent atoms:  
#1 x+1,y,z

Geometrical parameters for the X-ray diffraction structure of  
Boc-L-*trans*( $\beta$ Ph)Pro-D-Phe-NHMe (4a)

Bond lengths [Å] with standard deviations for 4a.

---

Molecule A

|             |          |
|-------------|----------|
| O(0)-C(5)   | 1.347(5) |
| O(0)-C(4)   | 1.471(5) |
| O(1)-C(5)   | 1.229(5) |
| O(2)-C(16)  | 1.225(5) |
| O(3)-C(25)  | 1.240(5) |
| N(1)-C(5)   | 1.341(5) |
| N(1)-C(9)   | 1.454(5) |
| N(1)-C(6)   | 1.470(5) |
| N(2)-C(16)  | 1.344(5) |
| N(2)-C(17)  | 1.446(5) |
| N(3)-C(25)  | 1.318(5) |
| N(3)-C(26)  | 1.452(5) |
| C(1)-C(4)   | 1.520(6) |
| C(2)-C(4)   | 1.513(6) |
| C(3)-C(4)   | 1.522(6) |
| C(6)-C(7)   | 1.503(5) |
| C(7)-C(8)   | 1.519(6) |
| C(8)-C(10)  | 1.515(5) |
| C(8)-C(9)   | 1.543(5) |
| C(9)-C(16)  | 1.520(6) |
| C(10)-C(11) | 1.380(6) |
| C(10)-C(15) | 1.384(6) |
| C(11)-C(12) | 1.393(6) |
| C(12)-C(13) | 1.370(6) |
| C(13)-C(14) | 1.371(6) |
| C(14)-C(15) | 1.365(5) |
| C(17)-C(18) | 1.520(5) |
| C(17)-C(25) | 1.537(5) |
| C(18)-C(19) | 1.495(5) |
| C(19)-C(20) | 1.380(6) |
| C(19)-C(24) | 1.390(6) |
| C(20)-C(21) | 1.391(6) |
| C(21)-C(22) | 1.373(6) |
| C(22)-C(23) | 1.374(6) |
| C(23)-C(24) | 1.389(6) |

**Molecule B**

|               |          |
|---------------|----------|
| O(0')-C(5')   | 1.328(5) |
| O(0')-C(4')   | 1.446(5) |
| O(1')-C(5')   | 1.233(5) |
| O(2')-C(16')  | 1.223(5) |
| O(3')-C(25')  | 1.243(5) |
| N(1')-C(5')   | 1.346(5) |
| N(1')-C(9')   | 1.447(5) |
| N(1')-C(6')   | 1.466(5) |
| N(2')-C(16')  | 1.357(5) |
| N(2')-C(17')  | 1.455(5) |
| N(3')-C(25')  | 1.314(5) |
| N(3')-C(26')  | 1.452(5) |
| C(1')-C(4')   | 1.520(7) |
| C(2')-C(4')   | 1.497(6) |
| C(3')-C(4')   | 1.517(6) |
| C(6')-C(7')   | 1.502(6) |
| C(7')-C(8')   | 1.531(6) |
| C(8')-C(10')  | 1.496(6) |
| C(8')-C(9')   | 1.553(6) |
| C(9')-C(16')  | 1.534(6) |
| C(10')-C(11') | 1.383(6) |
| C(10')-C(15') | 1.390(6) |
| C(11')-C(12') | 1.373(6) |
| C(12')-C(13') | 1.386(7) |
| C(13')-C(14') | 1.357(7) |
| C(14')-C(15') | 1.375(7) |
| C(17')-C(18') | 1.517(5) |
| C(17')-C(25') | 1.524(6) |
| C(18')-C(19') | 1.523(6) |
| C(19')-C(24') | 1.375(6) |
| C(19')-C(20') | 1.378(6) |
| C(20')-C(21') | 1.387(6) |
| C(21')-C(22') | 1.380(7) |
| C(22')-C(23') | 1.378(7) |
| C(23')-C(24') | 1.369(7) |

---

**Bond angles [deg] with standard deviations for 4a.**

---

**Molecule A**

|                   |          |
|-------------------|----------|
| C(5)-O(0)-C(4)    | 120.0(4) |
| C(5)-N(1)-C(9)    | 119.3(4) |
| C(5)-N(1)-C(6)    | 127.2(4) |
| C(9)-N(1)-C(6)    | 113.4(3) |
| C(16)-N(2)-C(17)  | 122.3(4) |
| C(25)-N(3)-C(26)  | 121.3(4) |
| O(0)-C(4)-C(2)    | 102.7(4) |
| O(0)-C(4)-C(1)    | 108.0(4) |
| C(2)-C(4)-C(1)    | 110.8(4) |
| O(0)-C(4)-C(3)    | 111.7(4) |
| C(2)-C(4)-C(3)    | 110.1(4) |
| C(1)-C(4)-C(3)    | 113.0(4) |
| O(1)-C(5)-N(1)    | 123.2(4) |
| O(1)-C(5)-O(0)    | 124.5(4) |
| N(1)-C(5)-O(0)    | 112.2(5) |
| N(1)-C(6)-C(7)    | 102.1(3) |
| C(6)-C(7)-C(8)    | 104.3(3) |
| C(10)-C(8)-C(7)   | 116.1(3) |
| C(10)-C(8)-C(9)   | 116.2(4) |
| C(7)-C(8)-C(9)    | 103.0(3) |
| N(1)-C(9)-C(16)   | 111.9(3) |
| N(1)-C(9)-C(8)    | 102.6(3) |
| C(16)-C(9)-C(8)   | 111.8(3) |
| C(11)-C(10)-C(15) | 118.4(4) |
| C(11)-C(10)-C(8)  | 117.8(4) |
| C(15)-C(10)-C(8)  | 123.8(4) |
| C(10)-C(11)-C(12) | 120.6(5) |
| C(13)-C(12)-C(11) | 119.9(5) |
| C(12)-C(13)-C(14) | 119.4(5) |
| C(15)-C(14)-C(13) | 121.0(5) |
| C(14)-C(15)-C(10) | 120.7(5) |
| O(2)-C(16)-N(2)   | 122.5(4) |
| O(2)-C(16)-C(9)   | 122.5(4) |
| N(2)-C(16)-C(9)   | 114.9(4) |
| N(2)-C(17)-C(18)  | 110.7(3) |
| N(2)-C(17)-C(25)  | 113.1(3) |
| C(18)-C(17)-C(25) | 110.0(4) |
| C(19)-C(18)-C(17) | 114.7(4) |
| C(20)-C(19)-C(24) | 116.7(4) |
| C(20)-C(19)-C(18) | 123.0(4) |

|                   |          |
|-------------------|----------|
| C(24)-C(19)-C(18) | 120.3(4) |
| C(19)-C(20)-C(21) | 121.9(5) |
| C(22)-C(21)-C(20) | 119.9(5) |
| C(21)-C(22)-C(23) | 119.8(5) |
| C(22)-C(23)-C(24) | 119.4(5) |
| C(23)-C(24)-C(19) | 122.2(5) |
| O(3)-C(25)-N(3)   | 123.7(4) |
| O(3)-C(25)-C(17)  | 119.0(4) |
| N(3)-C(25)-C(17)  | 117.3(4) |

**Molecule B**

|                      |          |
|----------------------|----------|
| C(5')-O(0')-C(4')    | 122.0(4) |
| C(5')-N(1')-C(9')    | 120.0(4) |
| C(5')-N(1')-C(6')    | 126.1(4) |
| C(9')-N(1')-C(6')    | 113.9(4) |
| C(16')-N(2')-C(17')  | 121.2(4) |
| C(25')-N(3')-C(26')  | 120.5(4) |
| O(0')-C(4')-C(2')    | 103.7(4) |
| O(0')-C(4')-C(3')    | 110.4(4) |
| C(2')-C(4')-C(3')    | 109.6(4) |
| O(0')-C(4')-C(1')    | 109.7(4) |
| C(2')-C(4')-C(1')    | 111.6(4) |
| C(3')-C(4')-C(1')    | 111.6(5) |
| O(1')-C(5')-O(0')    | 125.0(4) |
| O(1')-C(5')-N(1')    | 122.8(4) |
| O(0')-C(5')-N(1')    | 112.2(4) |
| N(1')-C(6')-C(7')    | 102.4(4) |
| C(6')-C(7')-C(8')    | 104.5(4) |
| C(10')-C(8')-C(7')   | 117.6(4) |
| C(10')-C(8')-C(9')   | 112.5(4) |
| C(7')-C(8')-C(9')    | 103.6(3) |
| N(1')-C(9')-C(16')   | 110.4(3) |
| N(1')-C(9')-C(8')    | 103.0(3) |
| C(16')-C(9')-C(8')   | 112.3(3) |
| C(11')-C(10')-C(15') | 116.8(5) |
| C(11')-C(10')-C(8')  | 120.4(5) |
| C(15')-C(10')-C(8')  | 122.7(5) |
| C(12')-C(11')-C(10') | 122.0(5) |
| C(11')-C(12')-C(13') | 120.5(5) |
| C(14')-C(13')-C(12') | 117.6(5) |
| C(13')-C(14')-C(15') | 122.5(6) |
| C(14')-C(15')-C(10') | 120.5(5) |
| O(2')-C(16')-N(2')   | 123.7(4) |
| O(2')-C(16')-C(9')   | 121.8(4) |
| N(2')-C(16')-C(9')   | 114.5(4) |

|                      |          |
|----------------------|----------|
| N(2')-C(17')-C(18')  | 111.4(4) |
| N(2')-C(17')-C(25')  | 114.1(4) |
| C(18')-C(17')-C(25') | 109.7(4) |
| C(17')-C(18')-C(19') | 116.1(4) |
| C(24')-C(19')-C(20') | 117.4(5) |
| C(24')-C(19')-C(18') | 119.6(5) |
| C(20')-C(19')-C(18') | 122.6(4) |
| C(19')-C(20')-C(21') | 122.1(5) |
| C(22')-C(21')-C(20') | 118.5(6) |
| C(23')-C(22')-C(21') | 120.5(5) |
| C(24')-C(23')-C(22') | 119.3(5) |
| C(23')-C(24')-C(19') | 122.2(6) |
| O(3')-C(25')-N(3')   | 123.2(4) |
| O(3')-C(25')-C(17')  | 117.2(4) |
| N(3')-C(25')-C(17')  | 119.6(4) |

---

**Torsion angles [deg] with standard deviations for 4a.**

---

**Molecule A**

|                         |           |
|-------------------------|-----------|
| C(5)-O(0)-C(4)-C(2)     | -178.9(4) |
| C(5)-O(0)-C(4)-C(1)     | 64.0(5)   |
| C(5)-O(0)-C(4)-C(3)     | -61.0(5)  |
| C(9)-N(1)-C(5)-O(1)     | 5.1(7)    |
| C(6)-N(1)-C(5)-O(1)     | -179.2(4) |
| C(9)-N(1)-C(5)-O(0)     | -173.9(3) |
| C(6)-N(1)-C(5)-O(0)     | 1.8(6)    |
| C(4)-O(0)-C(5)-O(1)     | 14.2(7)   |
| C(4)-O(0)-C(5)-N(1)     | -166.8(4) |
| C(5)-N(1)-C(6)-C(7)     | -160.0(4) |
| C(9)-N(1)-C(6)-C(7)     | 15.8(5)   |
| N(1)-C(6)-C(7)-C(8)     | -33.1(4)  |
| C(6)-C(7)-C(8)-C(10)    | 166.7(4)  |
| C(6)-C(7)-C(8)-C(9)     | 38.5(5)   |
| C(5)-N(1)-C(9)-C(16)    | -56.0(5)  |
| C(6)-N(1)-C(9)-C(16)    | 127.7(4)  |
| C(5)-N(1)-C(9)-C(8)     | -176.0(4) |
| C(6)-N(1)-C(9)-C(8)     | 7.8(5)    |
| C(10)-C(8)-C(9)-N(1)    | -156.1(4) |
| C(7)-C(8)-C(9)-N(1)     | -28.0(4)  |
| C(10)-C(8)-C(9)-C(16)   | 83.9(5)   |
| C(7)-C(8)-C(9)-C(16)    | -148.0(4) |
| C(7)-C(8)-C(10)-C(11)   | 80.6(5)   |
| C(9)-C(8)-C(10)-C(11)   | -158.0(4) |
| C(7)-C(8)-C(10)-C(15)   | -97.7(5)  |
| C(9)-C(8)-C(10)-C(15)   | 23.7(6)   |
| C(15)-C(10)-C(11)-C(12) | 0.1(7)    |
| C(8)-C(10)-C(11)-C(12)  | -178.3(4) |
| C(10)-C(11)-C(12)-C(13) | -1.9(8)   |
| C(11)-C(12)-C(13)-C(14) | 2.9(8)    |
| C(12)-C(13)-C(14)-C(15) | -2.1(8)   |
| C(13)-C(14)-C(15)-C(10) | 0.3(7)    |
| C(11)-C(10)-C(15)-C(14) | 0.7(7)    |
| C(8)-C(10)-C(15)-C(14)  | 179.0(4)  |
| C(17)-N(2)-C(16)-O(2)   | 0.2(6)    |
| C(17)-N(2)-C(16)-C(9)   | 177.8(3)  |
| N(1)-C(9)-C(16)-O(2)    | -55.1(6)  |
| C(8)-C(9)-C(16)-O(2)    | 59.3(5)   |
| N(1)-C(9)-C(16)-N(2)    | 127.2(4)  |
| C(8)-C(9)-C(16)-N(2)    | -118.4(4) |
| C(16)-N(2)-C(17)-C(18)  | -149.6(4) |
| C(16)-N(2)-C(17)-C(25)  | 86.4(5)   |
| N(2)-C(17)-C(18)-C(19)  | 56.8(5)   |
| C(25)-C(17)-C(18)-C(19) | -177.5(4) |
| C(17)-C(18)-C(19)-C(20) | 26.1(6)   |
| C(17)-C(18)-C(19)-C(24) | -155.8(4) |



|                         |           |
|-------------------------|-----------|
| C(24)-C(19)-C(20)-C(21) | -0.6(7)   |
| C(18)-C(19)-C(20)-C(21) | 177.6(4)  |
| C(19)-C(20)-C(21)-C(22) | -1.0(7)   |
| C(20)-C(21)-C(22)-C(23) | 3.1(7)    |
| C(21)-C(22)-C(23)-C(24) | -3.5(7)   |
| C(22)-C(23)-C(24)-C(19) | 1.9(7)    |
| C(20)-C(19)-C(24)-C(23) | 0.2(7)    |
| C(18)-C(19)-C(24)-C(23) | -178.0(4) |
| C(26)-N(3)-C(25)-O(3)   | 2.3(7)    |
| C(26)-N(3)-C(25)-C(17)  | -178.3(4) |
| N(2)-C(17)-C(25)-O(3)   | -176.2(4) |
| C(18)-C(17)-C(25)-O(3)  | 59.4(5)   |
| N(2)-C(17)-C(25)-N(3)   | 4.3(6)    |
| C(18)-C(17)-C(25)-N(3)  | -120.1(4) |

#### Molecule B

|                             |           |
|-----------------------------|-----------|
| C(5')-O(0')-C(4')-C(2')     | -174.9(4) |
| C(5')-O(0')-C(4')-C(3')     | -57.6(6)  |
| C(5')-O(0')-C(4')-C(1')     | 65.9(6)   |
| C(4')-O(0')-C(5')-O(1')     | -2.4(7)   |
| C(4')-O(0')-C(5')-N(1')     | 177.3(4)  |
| C(9')-N(1')-C(5')-O(1')     | -1.8(7)   |
| C(6')-N(1')-C(5')-O(1')     | -179.2(5) |
| C(9')-N(1')-C(5')-O(0')     | 178.5(4)  |
| C(6')-N(1')-C(5')-O(0')     | 1.1(6)    |
| C(5')-N(1')-C(6')-C(7')     | -163.3(4) |
| C(9')-N(1')-C(6')-C(7')     | 19.2(5)   |
| N(1')-C(6')-C(7')-C(8')     | -32.8(5)  |
| C(6')-C(7')-C(8')-C(10')    | 159.8(4)  |
| C(6')-C(7')-C(8')-C(9')     | 35.0(5)   |
| C(5')-N(1')-C(9')-C(16')    | -55.1(5)  |
| C(6')-N(1')-C(9')-C(16')    | 122.5(4)  |
| C(5')-N(1')-C(9')-C(8')     | -175.2(4) |
| C(6')-N(1')-C(9')-C(8')     | 2.4(5)    |
| C(10')-C(8')-C(9')-N(1')    | -150.8(4) |
| C(7')-C(8')-C(9')-N(1')     | -22.8(4)  |
| C(10')-C(8')-C(9')-C(16')   | 90.3(5)   |
| C(7')-C(8')-C(9')-C(16')    | -141.6(4) |
| C(7')-C(8')-C(10')-C(11')   | 175.0(4)  |
| C(9')-C(8')-C(10')-C(11')   | -64.7(5)  |
| C(7')-C(8')-C(10')-C(15')   | -7.1(6)   |
| C(9')-C(8')-C(10')-C(15')   | 113.1(5)  |
| C(15')-C(10')-C(11')-C(12') | 0.2(7)    |
| C(8')-C(10')-C(11')-C(12')  | 178.2(4)  |
| C(10')-C(11')-C(12')-C(13') | -0.2(8)   |
| C(11')-C(12')-C(13')-C(14') | 0.2(9)    |
| C(12')-C(13')-C(14')-C(15') | -0.2(9)   |
| C(13')-C(14')-C(15')-C(10') | 0.2(9)    |
| C(11')-C(10')-C(15')-C(14') | -0.1(8)   |
| C(8')-C(10')-C(15')-C(14')  | -178.1(5) |
| C(17')-N(2')-C(16')-O(2')   | 0.9(6)    |

|                             |           |
|-----------------------------|-----------|
| C(17')-N(2')-C(16')-C(9')   | -179.6(3) |
| N(1')-C(9')-C(16')-O(2')    | -49.9(5)  |
| C(8')-C(9')-C(16')-O(2')    | 64.5(5)   |
| N(1')-C(9')-C(16')-N(2')    | 130.6(4)  |
| C(8')-C(9')-C(16')-N(2')    | -115.0(4) |
| C(16')-N(2')-C(17')-C(18')  | -153.9(4) |
| C(16')-N(2')-C(17')-C(25')  | 81.2(5)   |
| N(2')-C(17')-C(18')-C(19')  | 70.6(5)   |
| C(25')-C(17')-C(18')-C(19') | -162.1(4) |
| C(17')-C(18')-C(19')-C(24') | -153.8(4) |
| C(17')-C(18')-C(19')-C(20') | 32.9(7)   |
| C(24')-C(19')-C(20')-C(21') | 0.0(8)    |
| C(18')-C(19')-C(20')-C(21') | 173.5(5)  |
| C(19')-C(20')-C(21')-C(22') | -1.1(8)   |
| C(20')-C(21')-C(22')-C(23') | 1.5(9)    |
| C(21')-C(22')-C(23')-C(24') | -0.8(9)   |
| C(22')-C(23')-C(24')-C(19') | -0.3(9)   |
| C(20')-C(19')-C(24')-C(23') | 0.7(8)    |
| C(18')-C(19')-C(24')-C(23') | -172.9(5) |
| C(26')-N(3')-C(25')-O(3')   | -0.9(7)   |
| C(26')-N(3')-C(25')-C(17')  | -179.6(4) |
| N(2')-C(17')-C(25')-O(3')   | -178.4(4) |
| C(18')-C(17')-C(25')-O(3')  | 55.8(5)   |
| N(2')-C(17')-C(25')-N(3')   | 0.4(6)    |
| C(18')-C(17')-C(25')-N(3')  | -125.4(4) |

---

**Dimensions [Å, deg] of the D-H...A hydrogen bonds for 4a.**

---

| D-H...A             | d(D-H) | d(H...A) | d(D...A) | <(DHA) |
|---------------------|--------|----------|----------|--------|
| N(3)-H(3)...O(1)    | 1.04   | 1.91     | 2.900(5) | 157.2  |
| N(3')-H(3')...O(1') | 1.05   | 1.94     | 2.905(5) | 151.2  |
| N(2')-H(2')...O(3)  | 1.05   | 1.86     | 2.906(4) | 173.5  |
| N(2)-H(2)...O(3')#1 | 1.02   | 1.85     | 2.842(5) | 162.8  |

---

Symmetry transformations used to generate equivalent atoms:  
#1 -x+1,y+1/2,-z+1

## Characterization of compounds **1a–4a**

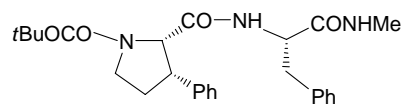

Boc-L-*cis*(βPh)Pro-L-Phe-NHMe (**1a**)

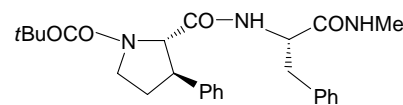

Boc-L-*trans*(βPh)Pro-L-Phe-NHMe (**3a**)

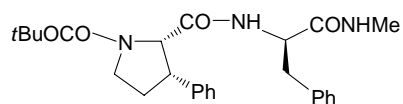

Boc-L-*cis*(βPh)Pro-D-Phe-NHMe (**2a**)

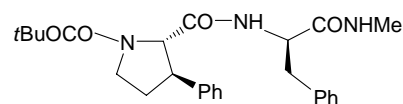

Boc-L-*trans*(βPh)Pro-D-Phe-NHMe (**4a**)

### General:

Melting points were determined on a Gallenkamp apparatus and are uncorrected. IR spectra were registered on a Nicolet Avatar 360 FTIR spectrophotometer;  $\nu_{\max}$  is given for the main absorption bands. Optical rotations were measured at room temperature using a JASCO P-1020 polarimeter.  $^1\text{H}$ - and  $^{13}\text{C}$ -NMR spectra were registered on Bruker AV-300 or AV-500 instruments at room temperature or 333K using the residual solvent signal as the internal standard; chemical shifts ( $\delta$ ) are expressed in ppm and coupling constants ( $J$ ) in Hertz. Peptide solutions at 10 mM concentration were used for the  $^1\text{H}$ -NMR spectra. For **4a** only a very small percentage of species with a *cis* Boc group was observed (signals non reported). High-resolution mass spectra were obtained on a Bruker Microtof-Q spectrometer.

**Boc-L-*cis*(βPh)Pro-L-Phe-NHMe (1a):** mp 116 °C;  $[\alpha]_{\text{D}}^{20} = +72.1$  ( $c = 0.44$ , MeOH); IR (nujol)  $\nu_{\max}/\text{cm}^{-1}$  3387, 3332, 1711, 1698, 1653;  $^1\text{H}$ -NMR (300 MHz,  $\text{CDCl}_3$ , 333K)  $\delta_{\text{H}}$  1.43 (9H, s), 2.11 (1H, m), 2.37 (1H, m), 2.56 (3H, d,  $J = 4.7$  Hz), 2.85 (1H, m), 3.08 (1H, m), 3.49 (1H, m), 3.62 (1H, m), 3.75 (1H, m), 4.27 (1H, m), 4.35 (1H, d,  $J = 8.9$  Hz), 5.30–6.00 (2H, m), 7.10–7.47 (10H, m);  $^{13}\text{C}$ -NMR (125 MHz,  $\text{CDCl}_3$ , 298K) (when observed, the signals corresponding to the minor rotamer are in italics)  $\delta_{\text{C}}$  26.10, 27.24/28.87, 28.28, 37.10/37.75, 46.02/46.56, 46.73/47.97, 53.36/54.66, 65.43, 80.66, 127.01, 127.29, 127.87, 128.36, 128.69, 129.33, 136.77, 137.13, 154.00/155.03, 169.38, 170.28/170.68; HRMS (ESI)  $\text{C}_{26}\text{H}_{33}\text{N}_3\text{NaO}_4$   $[\text{M}+\text{Na}]^+$ : calcd. 474.2363, found 474.2382.

**Boc-L-*cis*(βPh)Pro-D-Phe-NHMe (2a):** mp 218 °C;  $[\alpha]_{\text{D}}^{20} = +127.6$  ( $c = 0.53$ , MeOH); IR (nujol)  $\nu_{\max}/\text{cm}^{-1}$  3338, 3269, 1676, 1646, 1637;  $^1\text{H}$ -NMR (500 MHz,  $\text{CDCl}_3$ , 333K)  $\delta_{\text{H}}$  1.45 (9H, s), 2.11 (1H, m), 2.25 (1H, m), 2.65 (3H, m), 2.81 (1H, m), 3.24 (1H, m), 3.46 (1H, m), 3.57 (1H, m), 3.86 (1H, m), 4.09 (1H, m), 4.41 (1H, m), 5.32 (1H, m), 6.58–7.00 (3H, m), 7.08–7.48 (8H, m);  $^{13}\text{C}$ -NMR (125 MHz,  $\text{CDCl}_3$ , 298K) (when observed, the signals corresponding to the minor rotamer are in italics)  $\delta_{\text{C}}$  26.28, 27.31/28.52, 28.37, 35.78/37.87, 46.00/46.61, 47.33/48.22, 52.60/54.17, 65.43/65.91, 80.15/80.59, 126.92, 127.67, 128.13, 128.55, 128.57, 129.20/129.47, 135.96, 136.57, 153.79/155.30, 170.19, 170.69. HRMS (ESI)  $\text{C}_{26}\text{H}_{33}\text{N}_3\text{NaO}_4$   $[\text{M}+\text{Na}]^+$ : calcd. 474.2363, found 474.2385.

**Boc-L-trans( $\beta$ Ph)Pro-L-Phe-NHMe (3a):** mp 172 °C;  $[\alpha]_D^{25} = +30.5$  (c = 0.22; MeOH); IR (nujol)  $\nu_{\max}/\text{cm}^{-1}$  3347, 3219, 1698, 1687, 1656;  $^1\text{H-NMR}$  (300 MHz,  $\text{CDCl}_3$ , 333K) 1.44 (9H, s), 1.94 (1H, m), 2.10 (1H, m), 2.73 (3H, d,  $J = 4.6$  Hz), 3.17 (2H, m), 3.27–3.52 (2H, m), 3.62 (1H, m), 4.27 (1H, m), 4.65 (1H, m), 6.15–6.55 (2H, m), 7.12–7.61 (10H, m);  $^{13}\text{C-NMR}$  (125 MHz,  $\text{CDCl}_3$ , 298K) (when observed, the signals corresponding to the minor rotamer are in italics)  $\delta_{\text{C}}$  26.20, 28.25, *31.73/32.57*, *37.12/37.69*, 46.15, 47.54/49.37, 53.48/54.14, 66.82/67.38, 81.11, 126.84, 126.99, 127.05, 128.67, 128.74, 129.23, 136.87, 141.04, *154.13/155.39*, 170.94, 170.95; HRMS (ESI)  $\text{C}_{26}\text{H}_{33}\text{N}_3\text{NaO}_4$   $[\text{M}+\text{Na}]^+$ : calcd. 474.2363, found 474.2355.

**Boc-L-trans( $\beta$ Ph)Pro-D-Phe-NHMe (4a):** mp 176 °C;  $[\alpha]_D^{25} = +70.3$  (c = 0.40, MeOH); IR (nujol)  $\nu_{\max}/\text{cm}^{-1}$  3331, 3310, 3280, 1680, 1673, 1649;  $^1\text{H-NMR}$  (500 MHz,  $\text{CDCl}_3$ , 298K)  $\delta_{\text{H}}$  1.45 (9H, s), 2.08 (1H, m), 2.27 (1H, m), 2.73 (3H, d,  $J = 4.6$  Hz), 2.76 (1H, dd,  $J = 13.8, 5.6$  Hz), 3.33 (1H, dd,  $J = 13.8, 5.4$  Hz), 3.55 (2H, m), 3.67–3.81 (1H, m) overlapped with 3.75 (1H, d,  $J = 8.6$  Hz), 4.80 (1H, ddd,  $J = 9.4, 5.6, 5.4$  Hz), 5.55 (1H, br d,  $J = 9.4$  Hz), 6.75 (2H, m), 7.04–7.21 (5H, m), 7.30–7.43 (4H, m);  $^{13}\text{C-NMR}$  (125 MHz,  $\text{CDCl}_3$ , 298K)  $\delta_{\text{C}}$  26.31, 28.41, 32.73, 36.25, 47.26, 48.65, 53.09, 68.67, 80.77, 126.79, 127.20, 127.45, 128.58, 128.89, 129.35, 136.19, 139.50, 154.95, 170.80, 171.11; HRMS (ESI)  $\text{C}_{26}\text{H}_{33}\text{N}_3\text{NaO}_4$   $[\text{M}+\text{Na}]^+$ : calcd. 474.2363, found 474.2346.

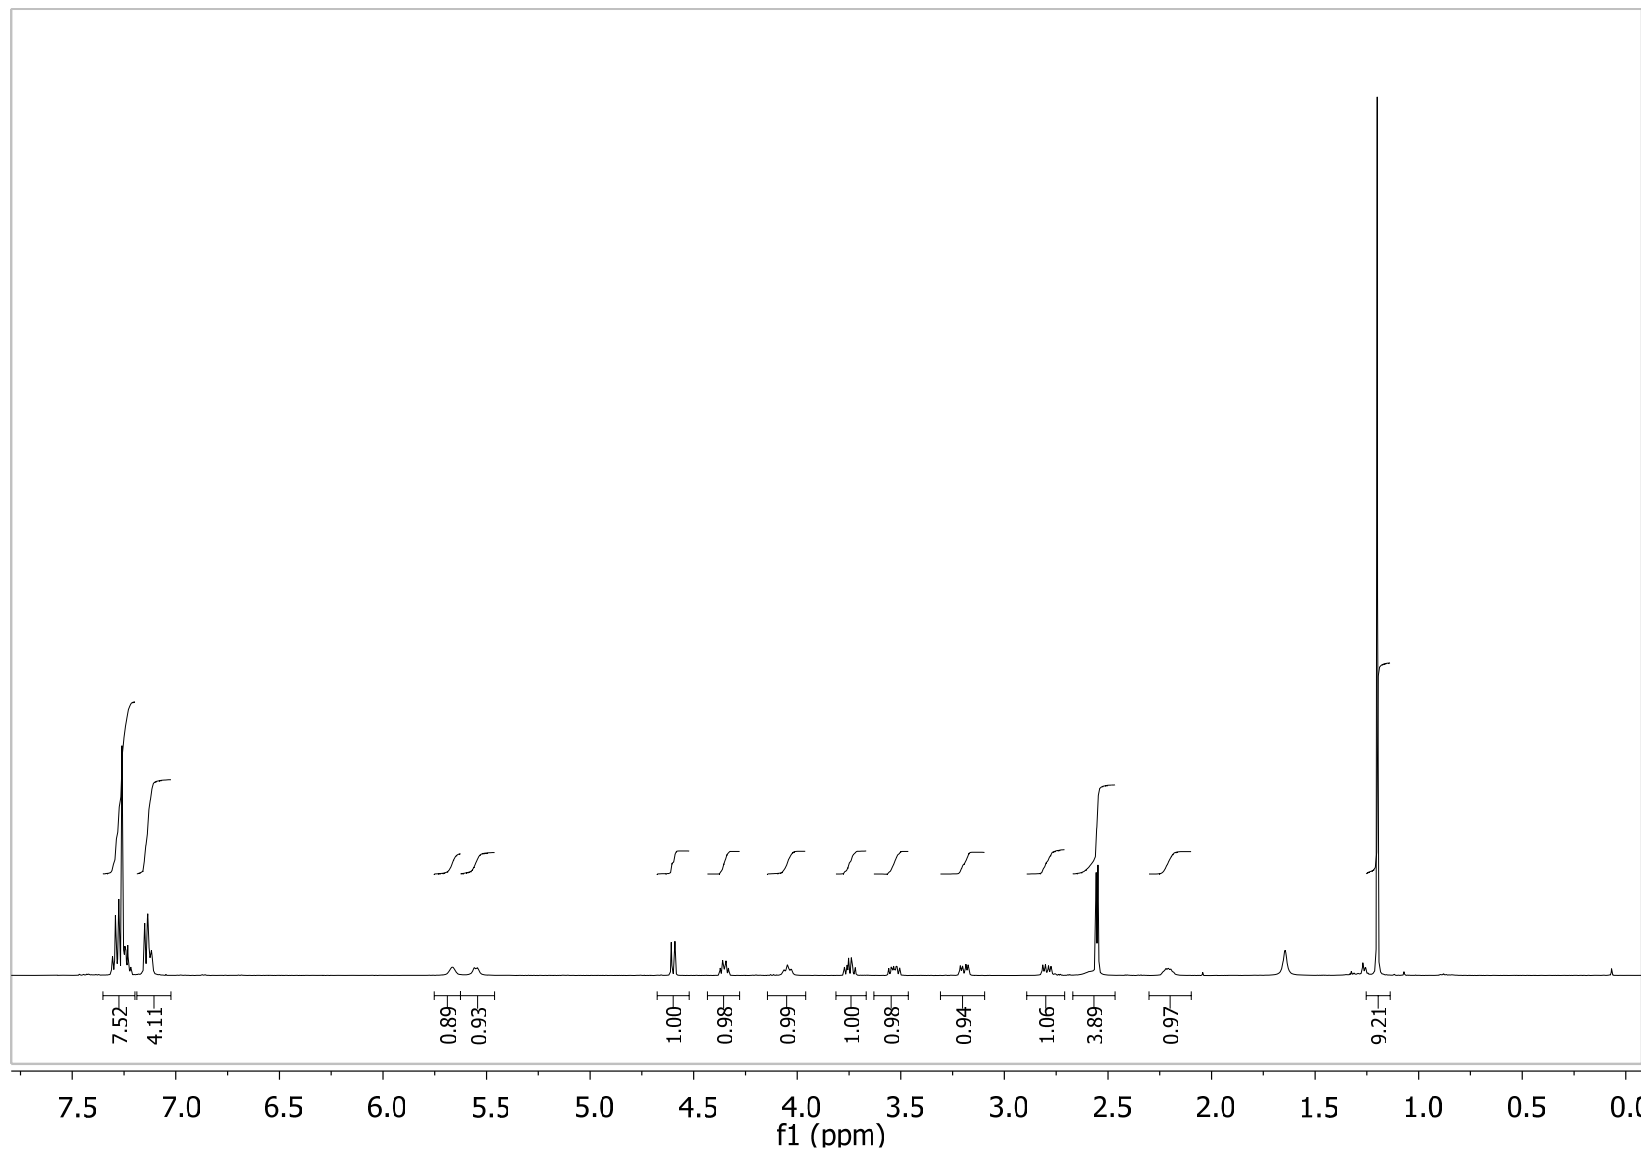

<sup>1</sup>H-NMR spectrum of Piv-L-cis(βPh)Pro-L-Phe-NHMe (1) in CDCl<sub>3</sub> (10 mm, 500 MHz, 298K)

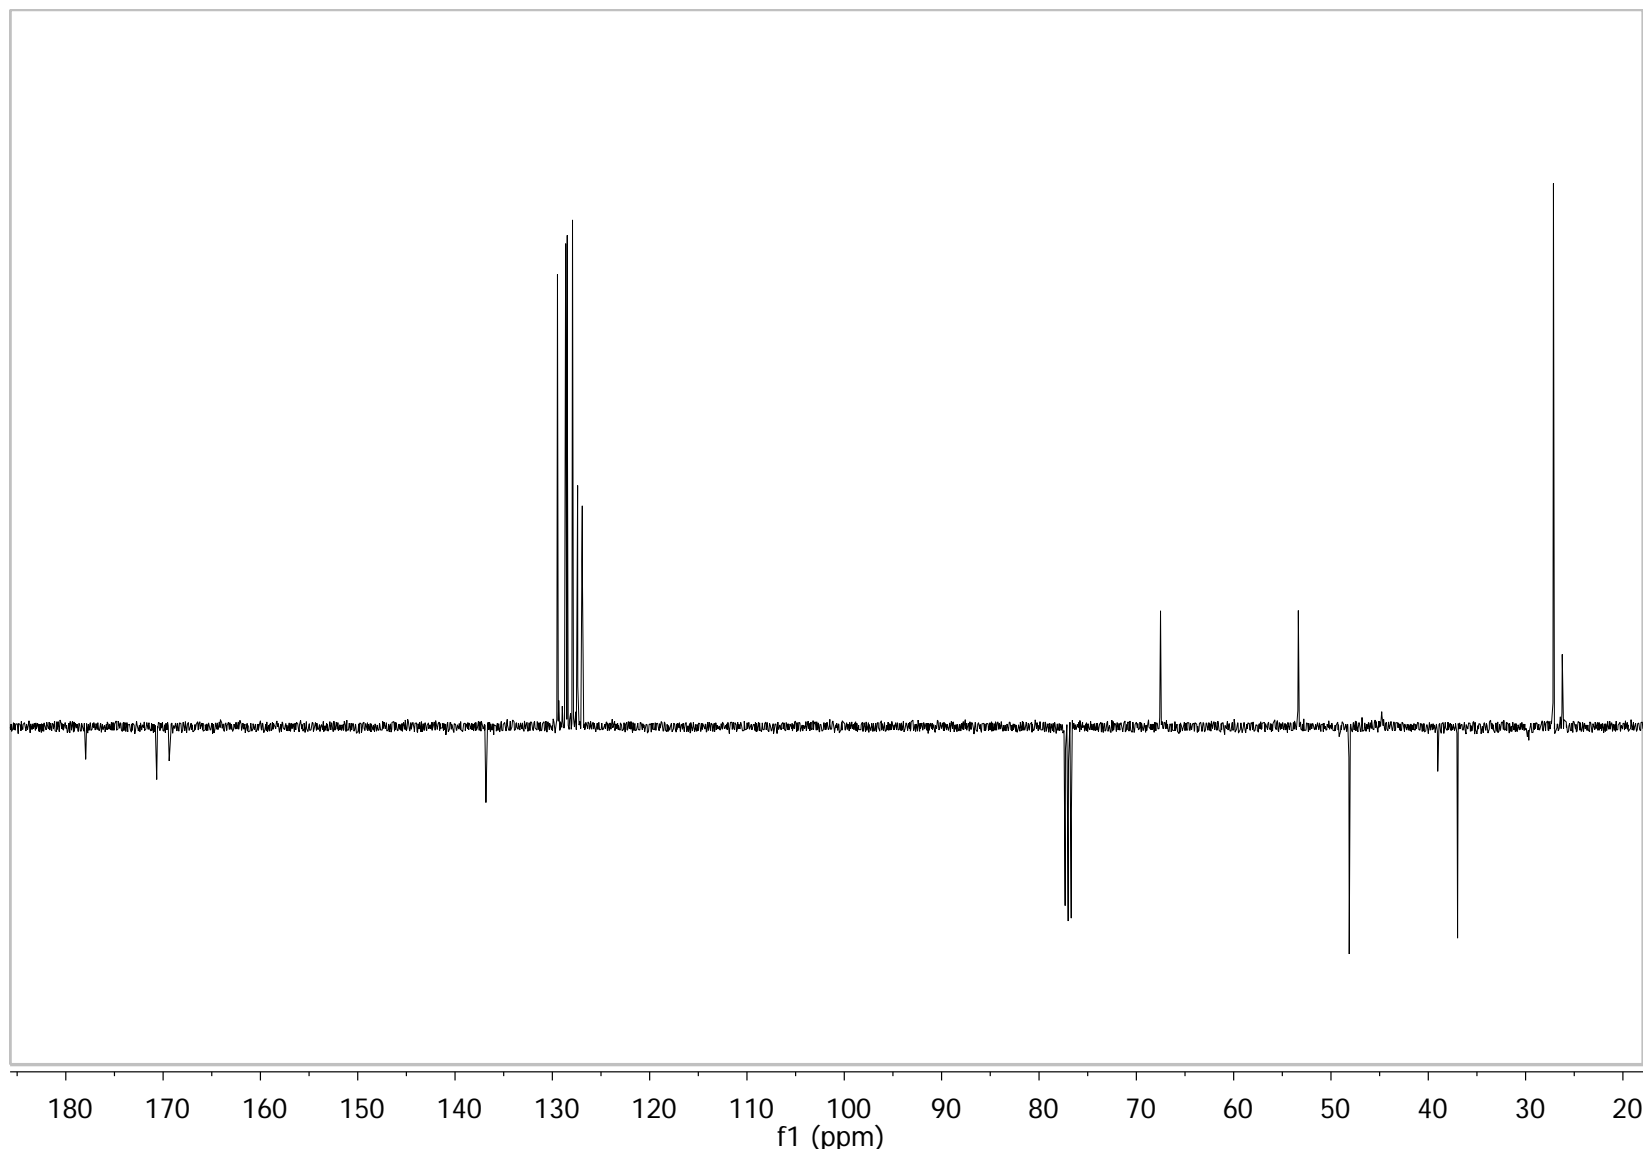

$^{13}\text{C}$ -NMR spectrum of Piv-L-*cis*( $\beta$ Ph)Pro-L-Phe-NHMe (**1**) in  $\text{CDCl}_3$  (100 MHz, 298K)

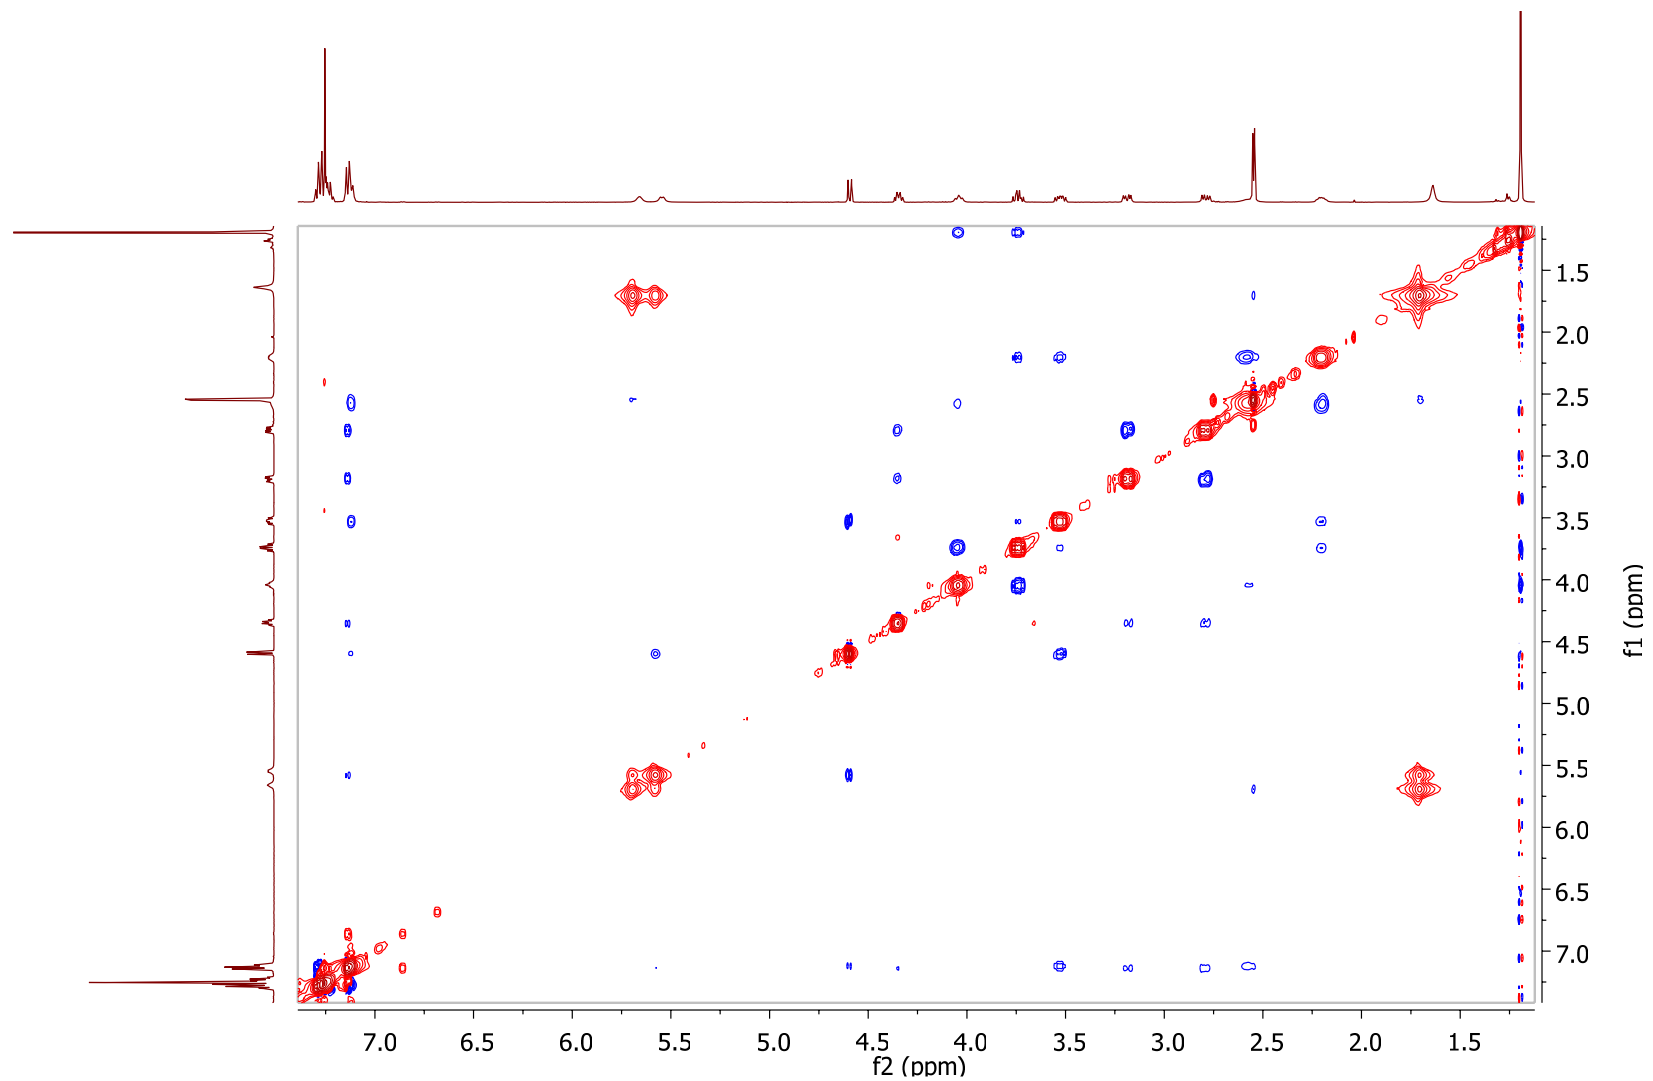

2D-NOESY spectrum of Piv-L-*cis*( $\beta$ Ph)Pro-L-Phe-NHMe (**1**) in  $\text{CDCl}_3$  (10 mM, 500 MHz, 298K, 500 ms mixing time)

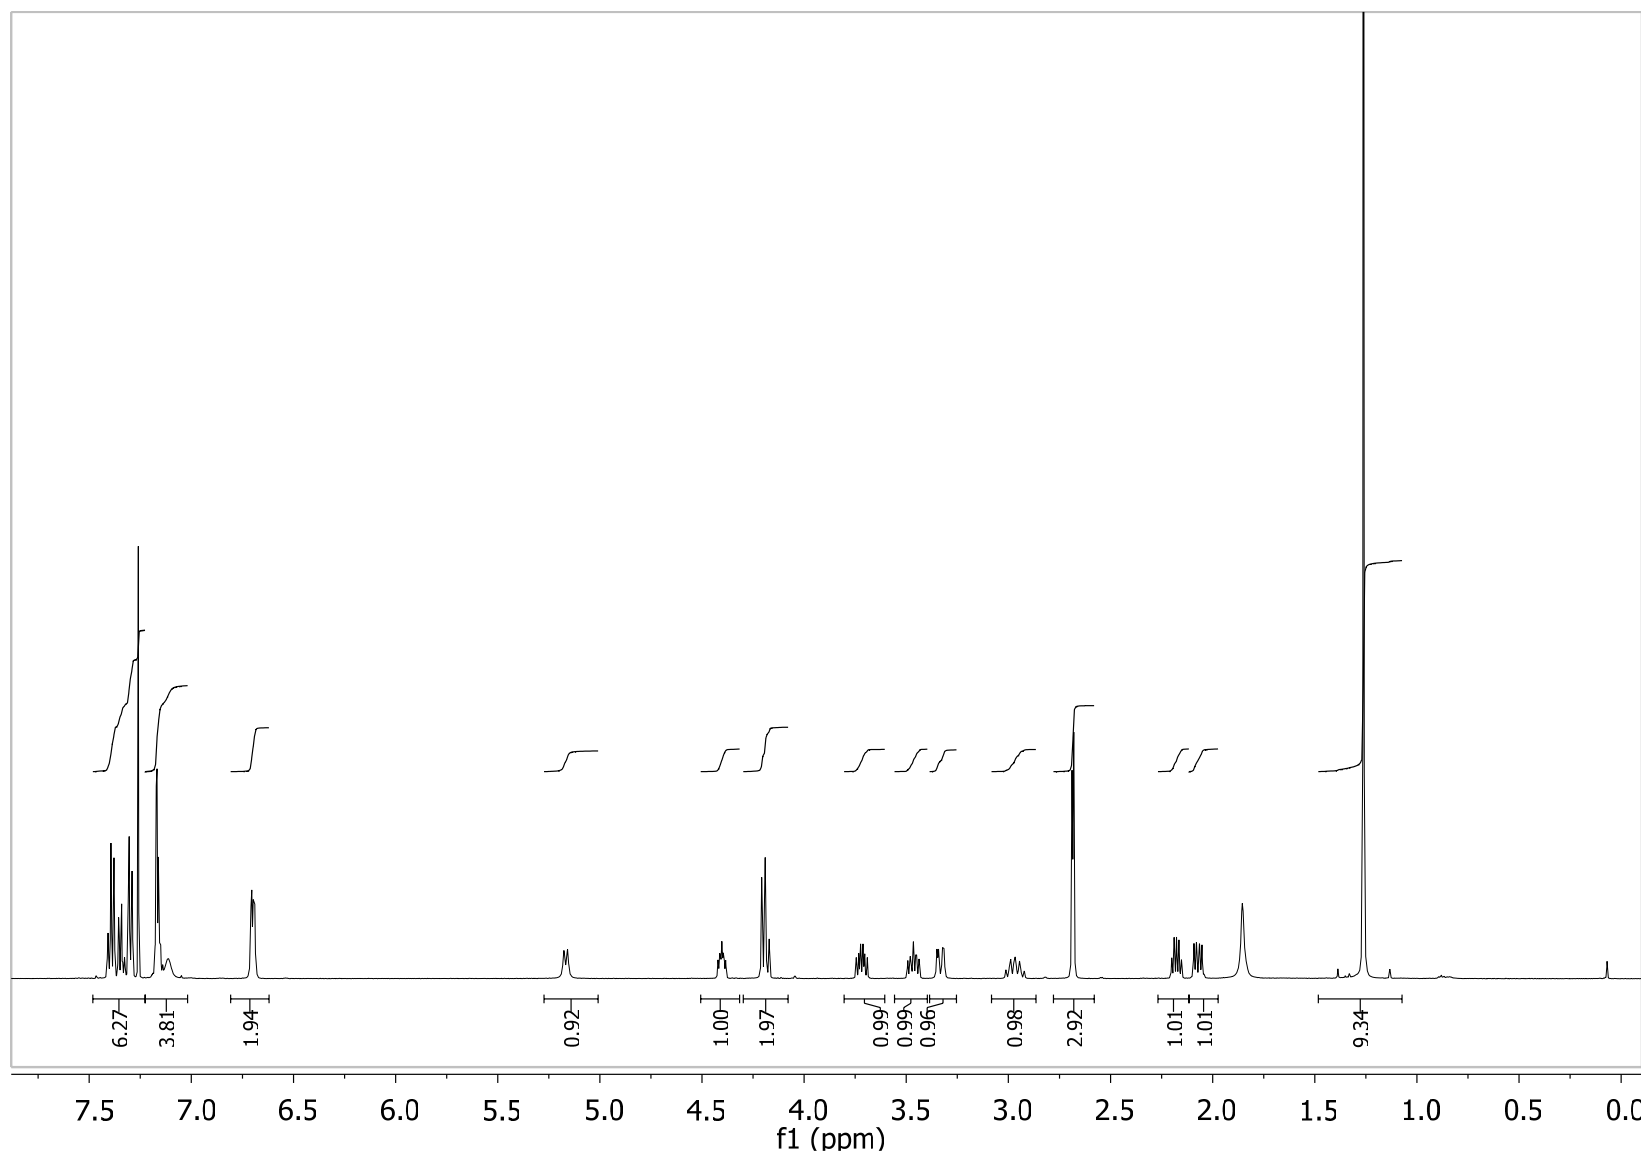

<sup>1</sup>H-NMR spectrum of Piv-L-cis(βPh)Pro-D-Phe-NHMe (2) in CDCl<sub>3</sub> (10 mm, 500 MHz, 298K)



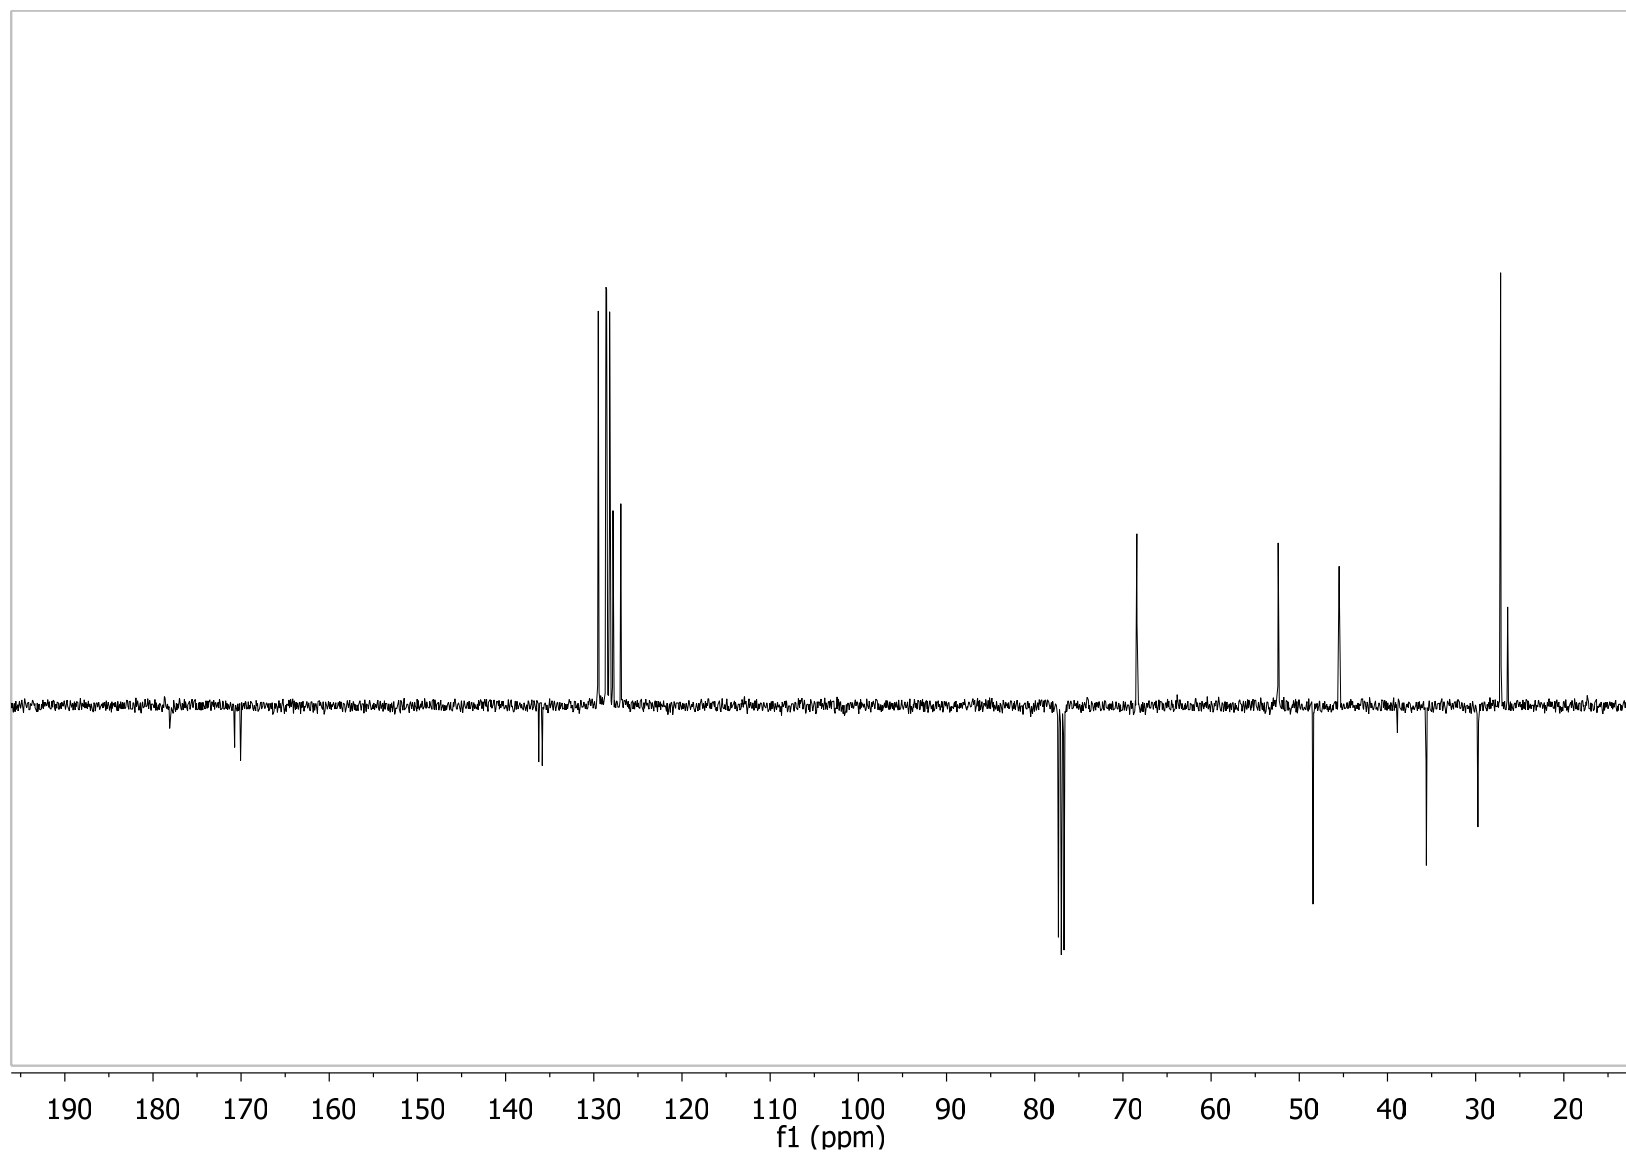

$^{13}\text{C}$ -NMR spectrum of Piv-L-cis( $\beta$ Ph)Pro-D-Phe-NHMe (**2**) in  $\text{CDCl}_3$  (100 MHz, 298K)

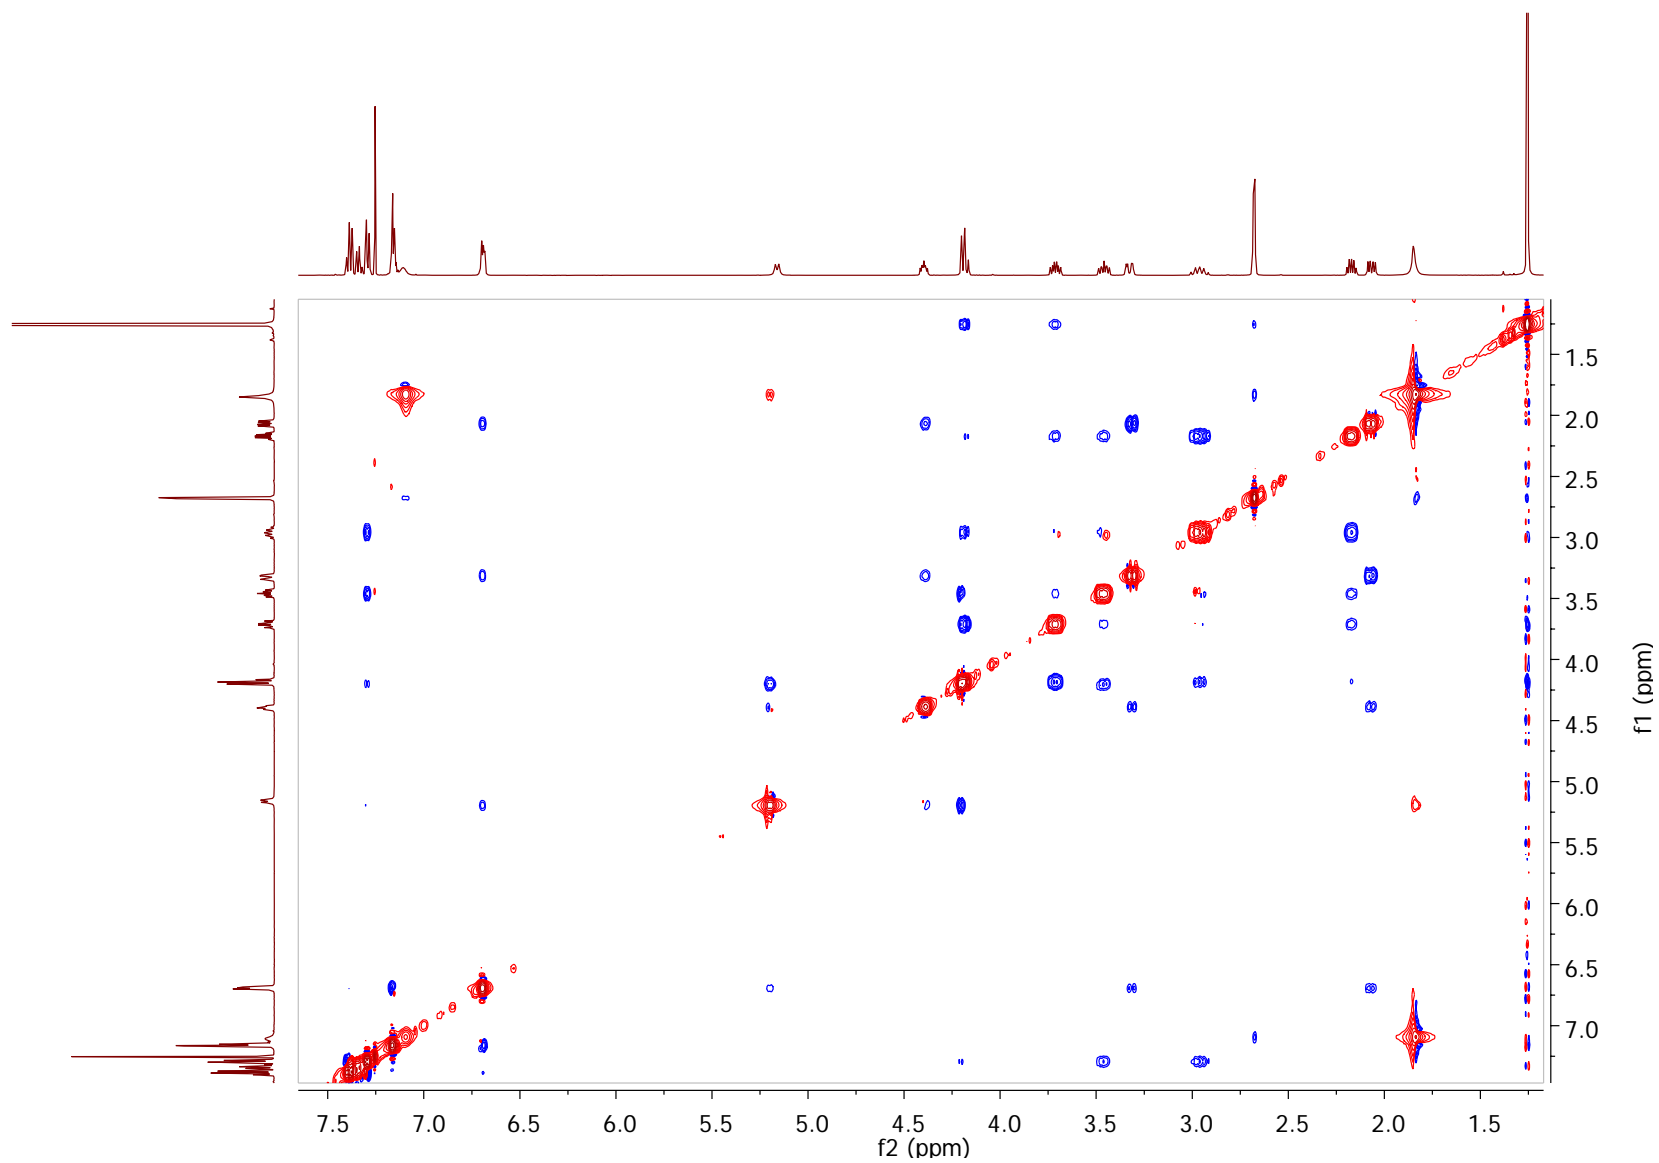

2D-NOESY spectrum of Piv-L-cis( $\beta$ Ph)Pro-D-Phe-NHMe (**2**) in  $\text{CDCl}_3$  (10 mm, 500 MHz, 298K, 500 ms mixing time)

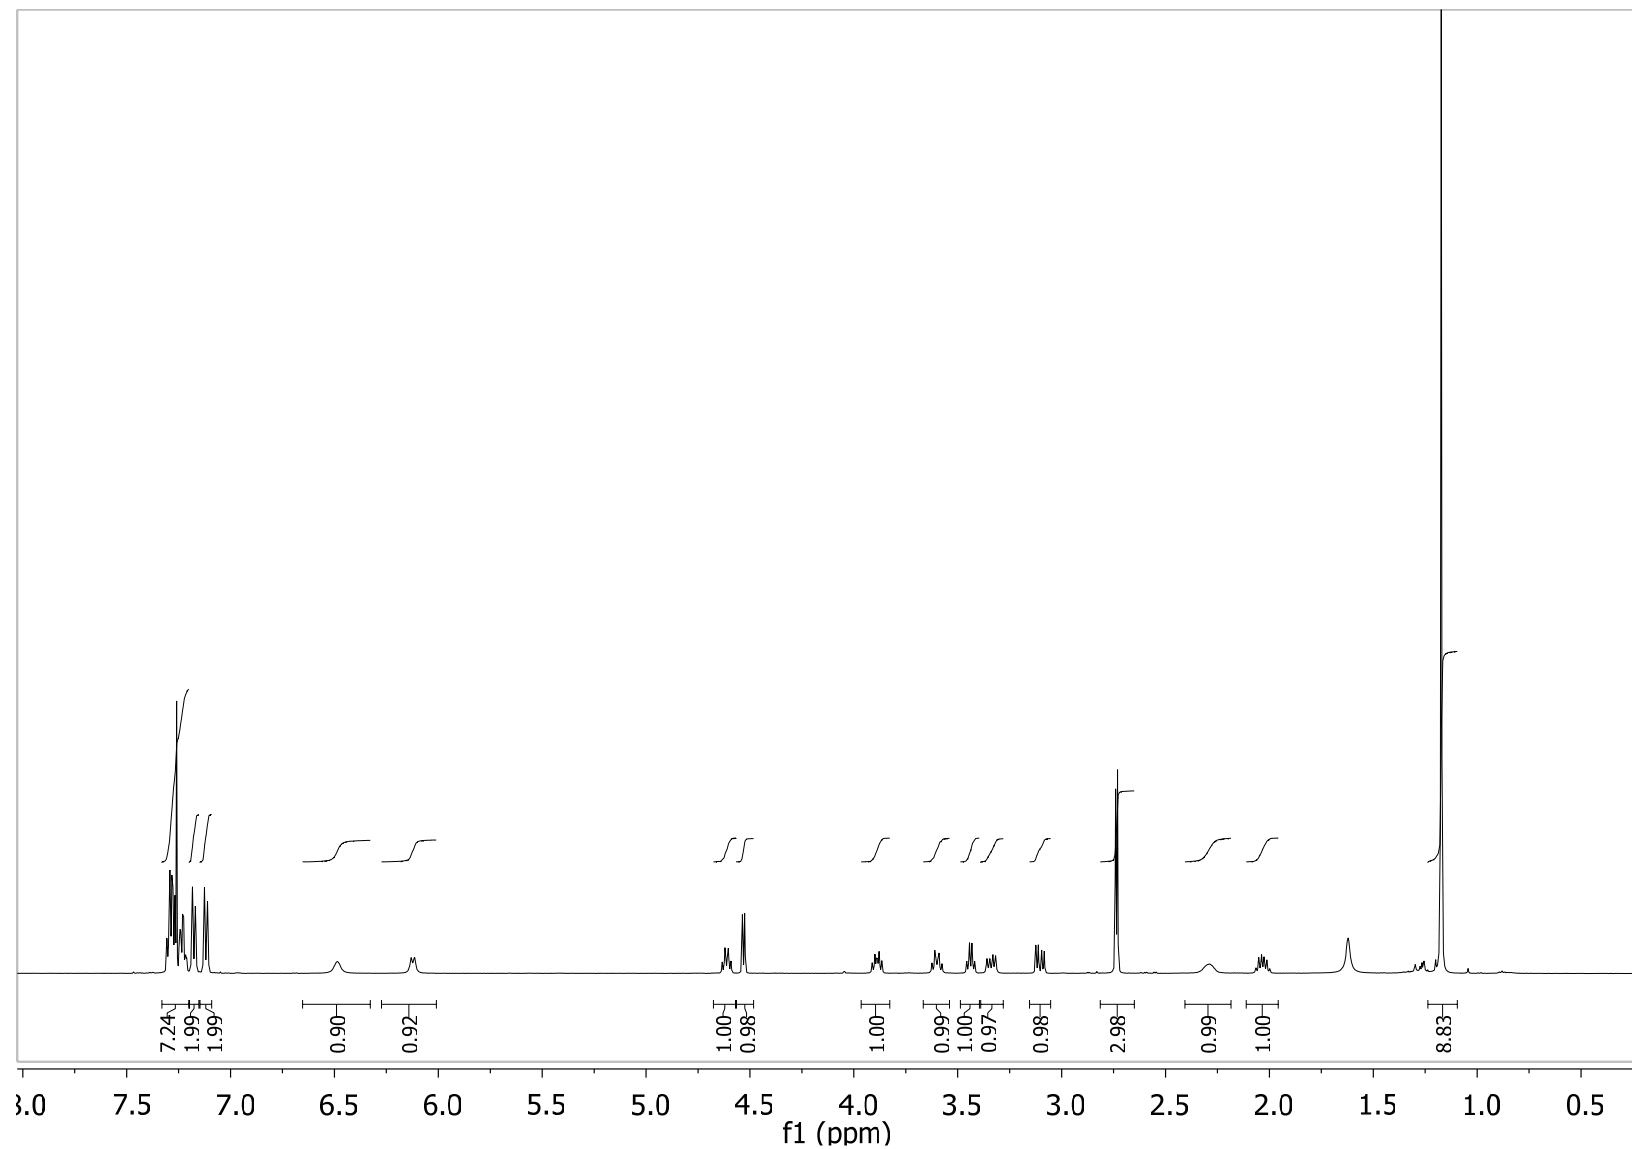

<sup>1</sup>H-NMR spectrum of Piv-L-*trans*(βPh)Pro-L-Phe-NHMe (**3**) in CDCl<sub>3</sub> (10 mm, 500 MHz, 298K)

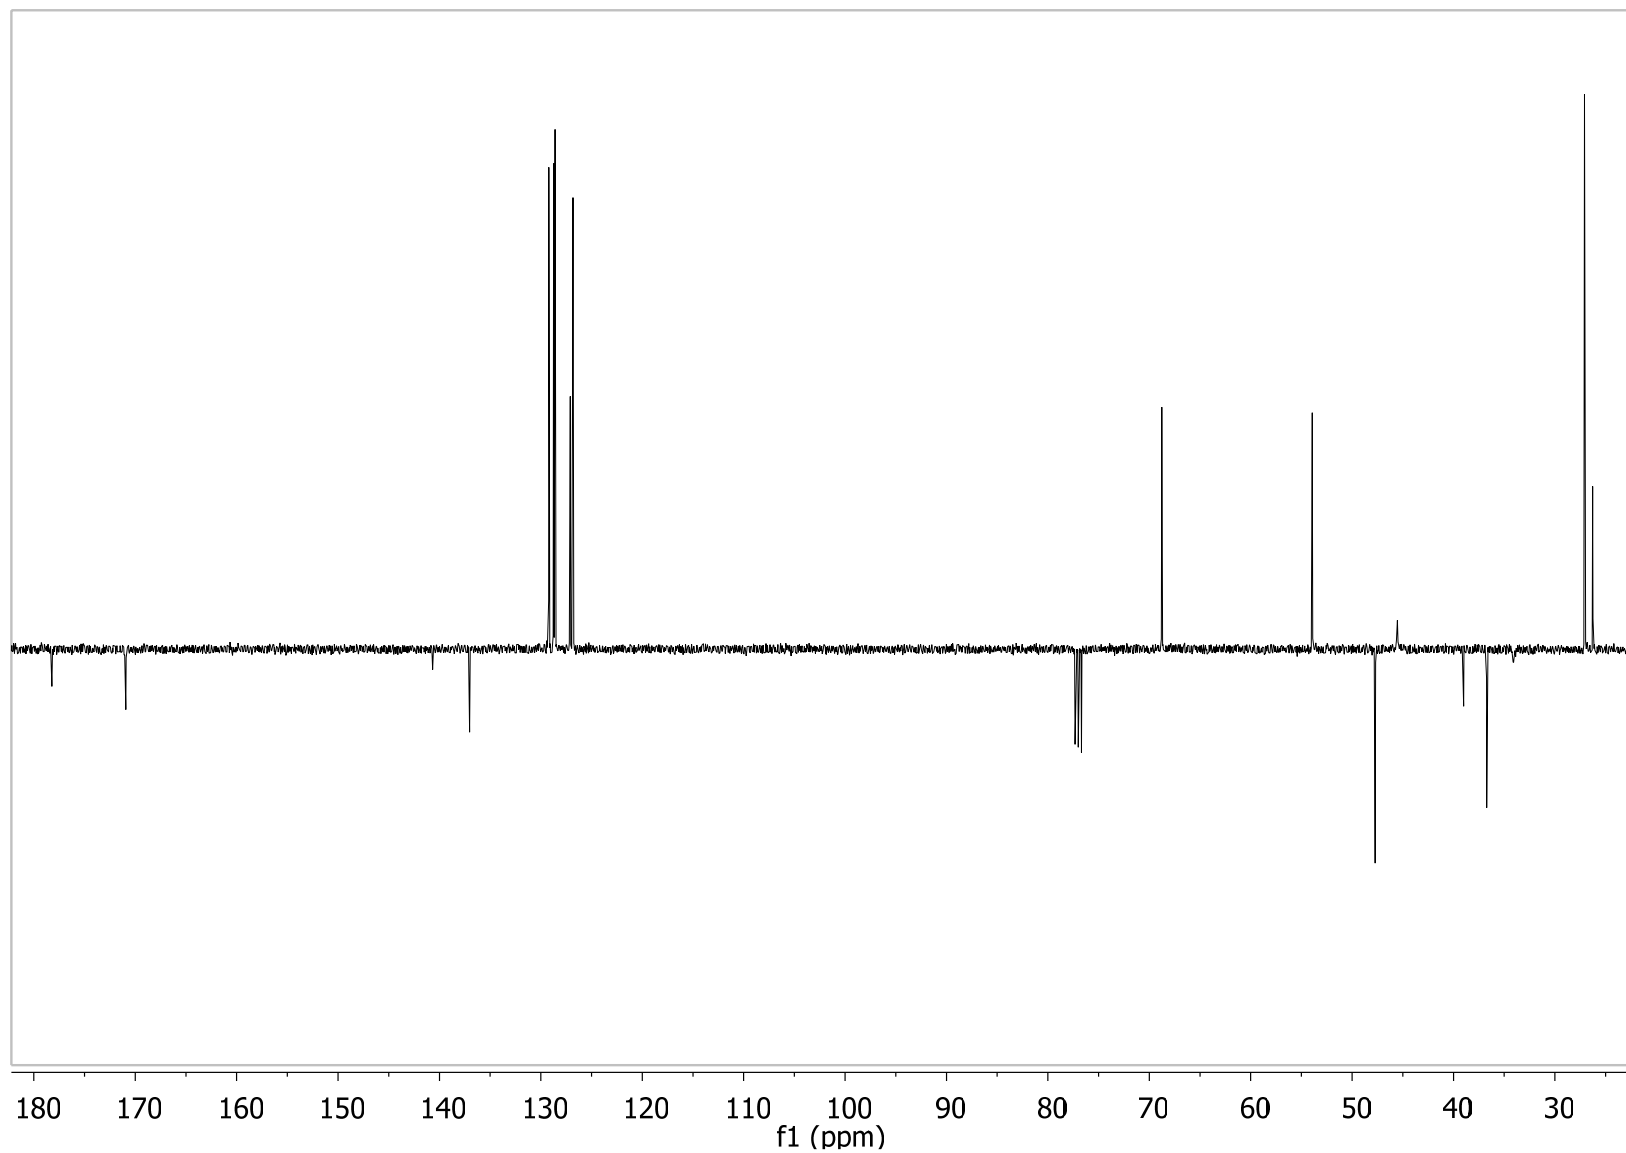

$^{13}\text{C}$ -NMR spectrum of Piv-L-*trans*( $\beta$ Ph)Pro-L-Phe-NHMe (**3**) in  $\text{CDCl}_3$  (100 MHz, 298K)

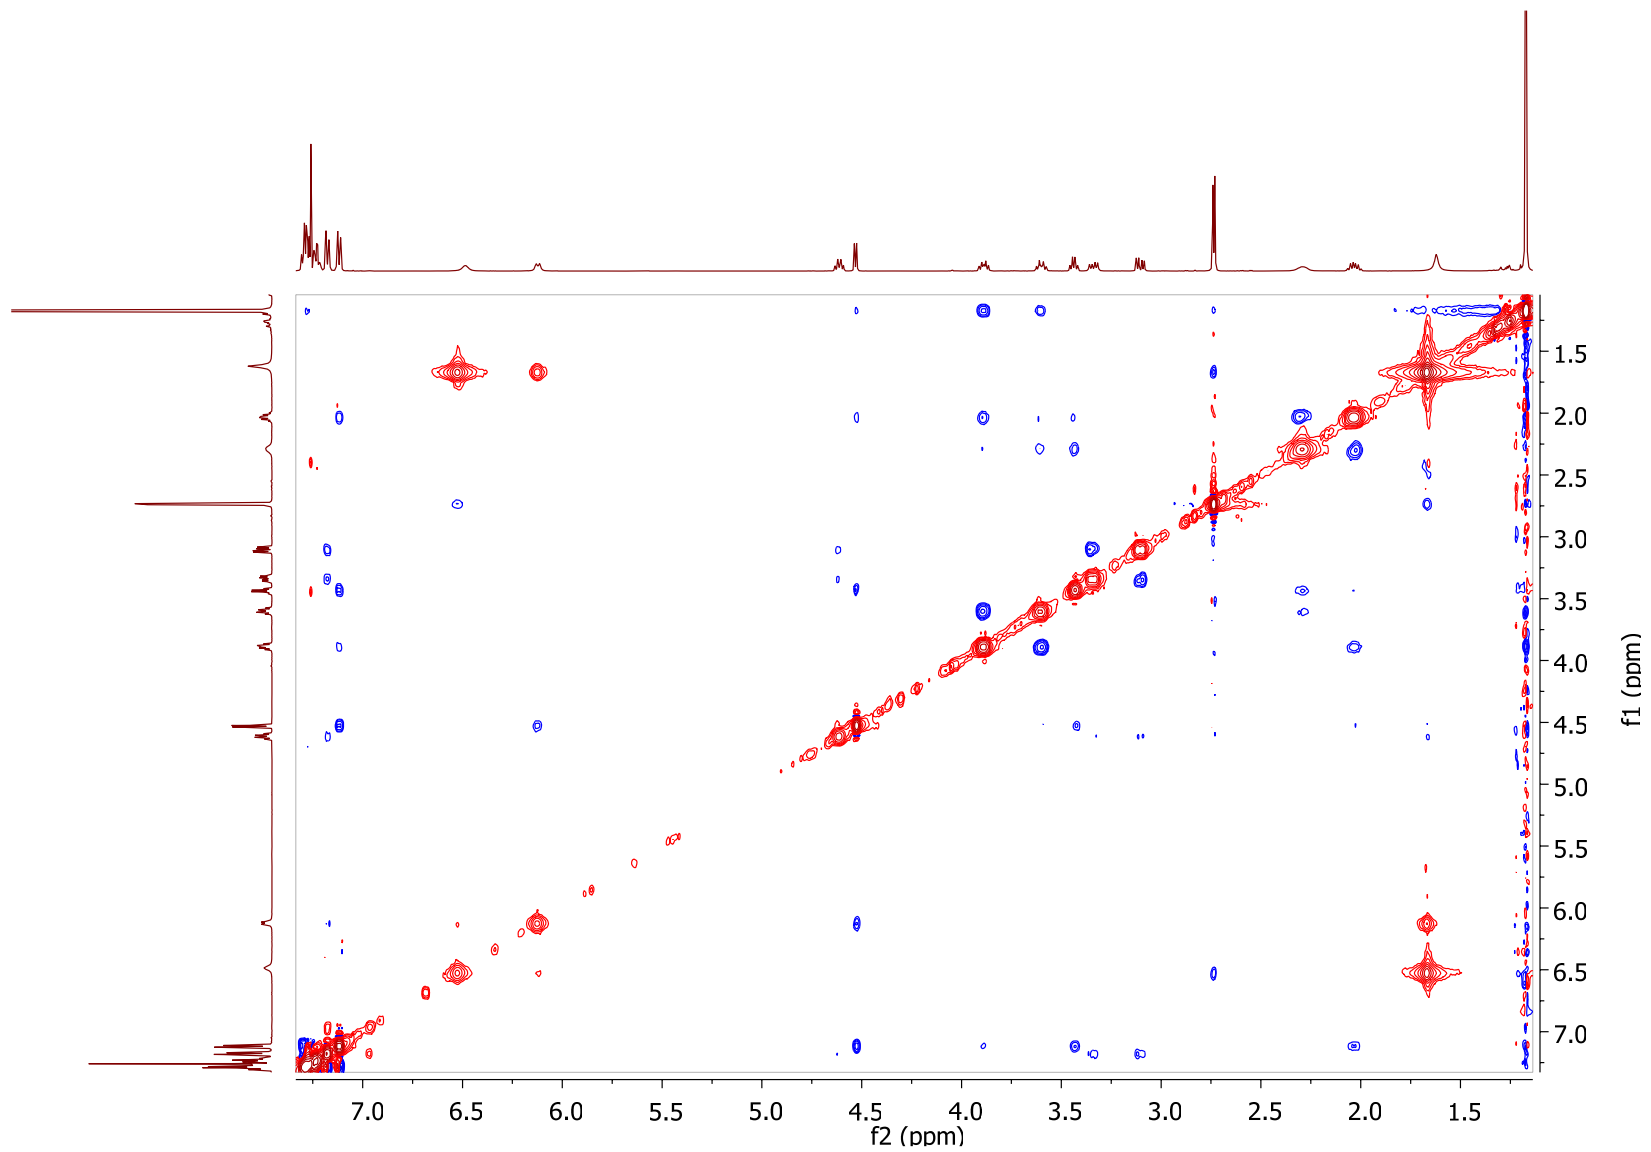

2D-NOESY spectrum of Piv-L-*trans*( $\beta$ Ph)Pro-L-Phe-NHMe (**3**) in  $\text{CDCl}_3$  (10 mM, 500 MHz, 298K, 500 ms mixing time)

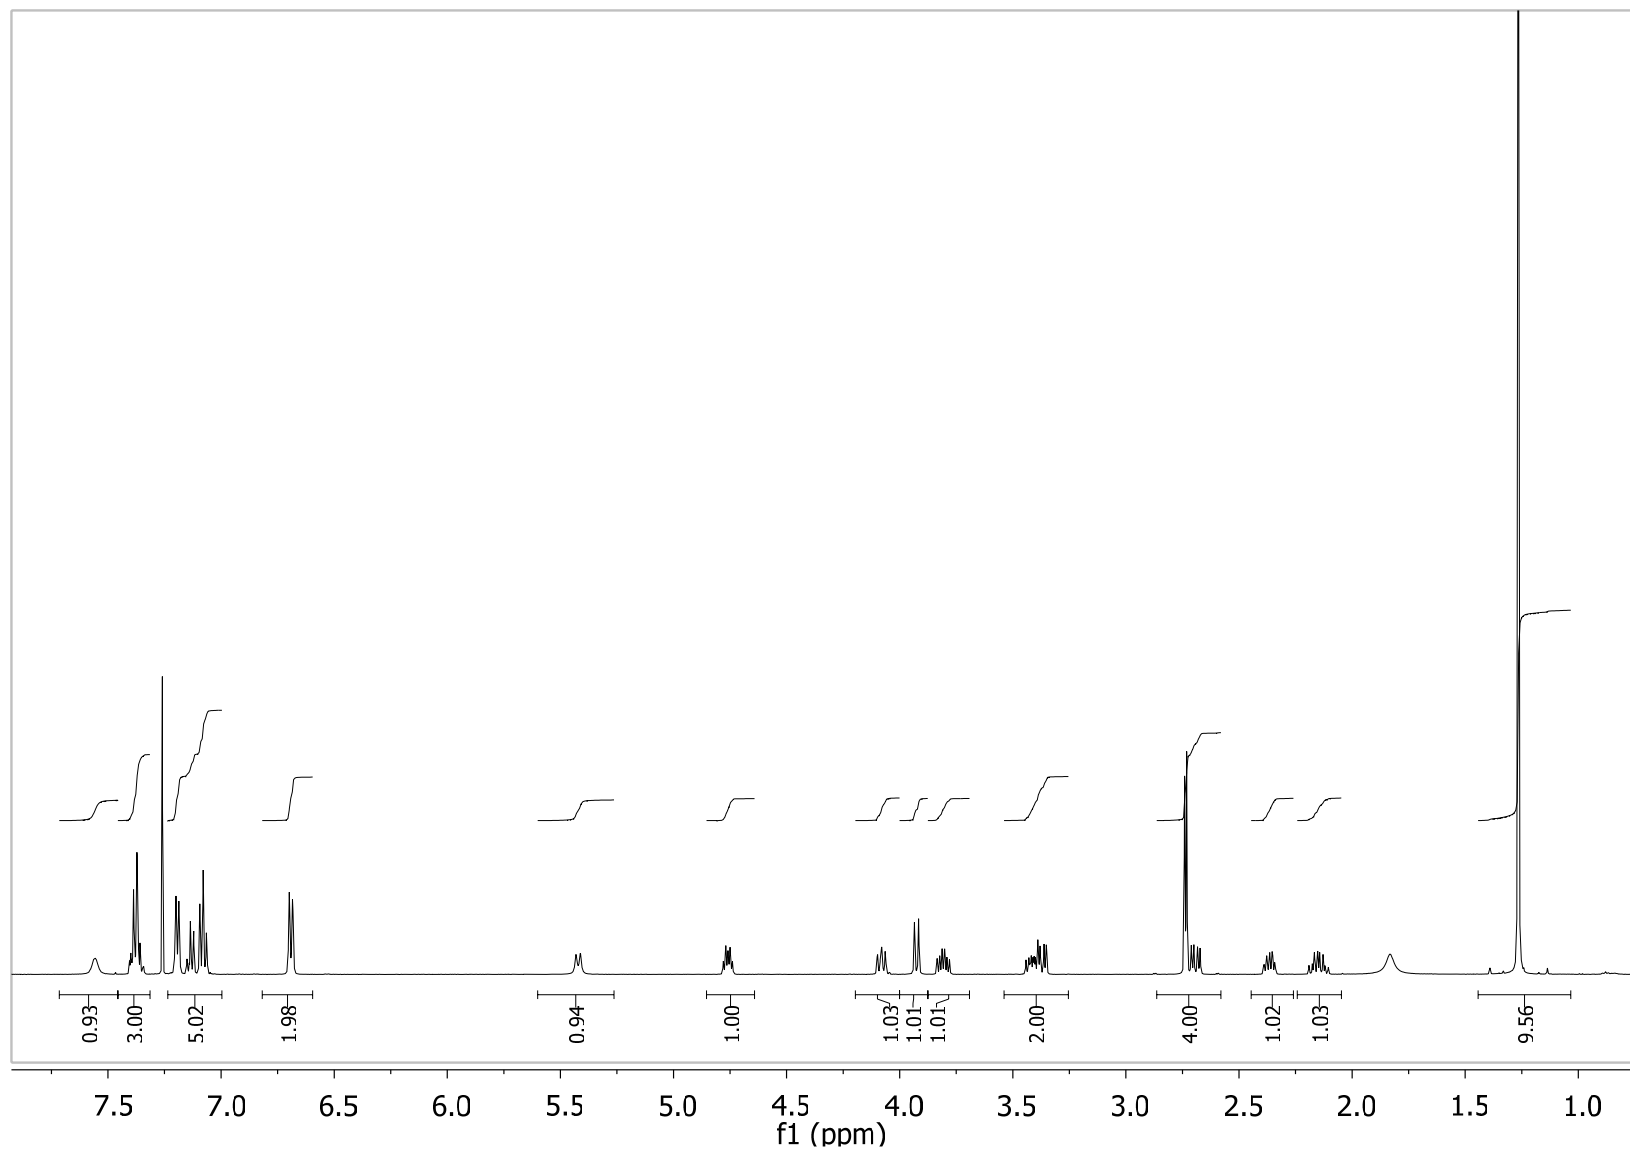

<sup>1</sup>H-NMR spectrum of Piv-L-*trans*(βPh)Pro-D-Phe-NHMe (4) in CDCl<sub>3</sub> (10 mM, 500 MHz, 298K)

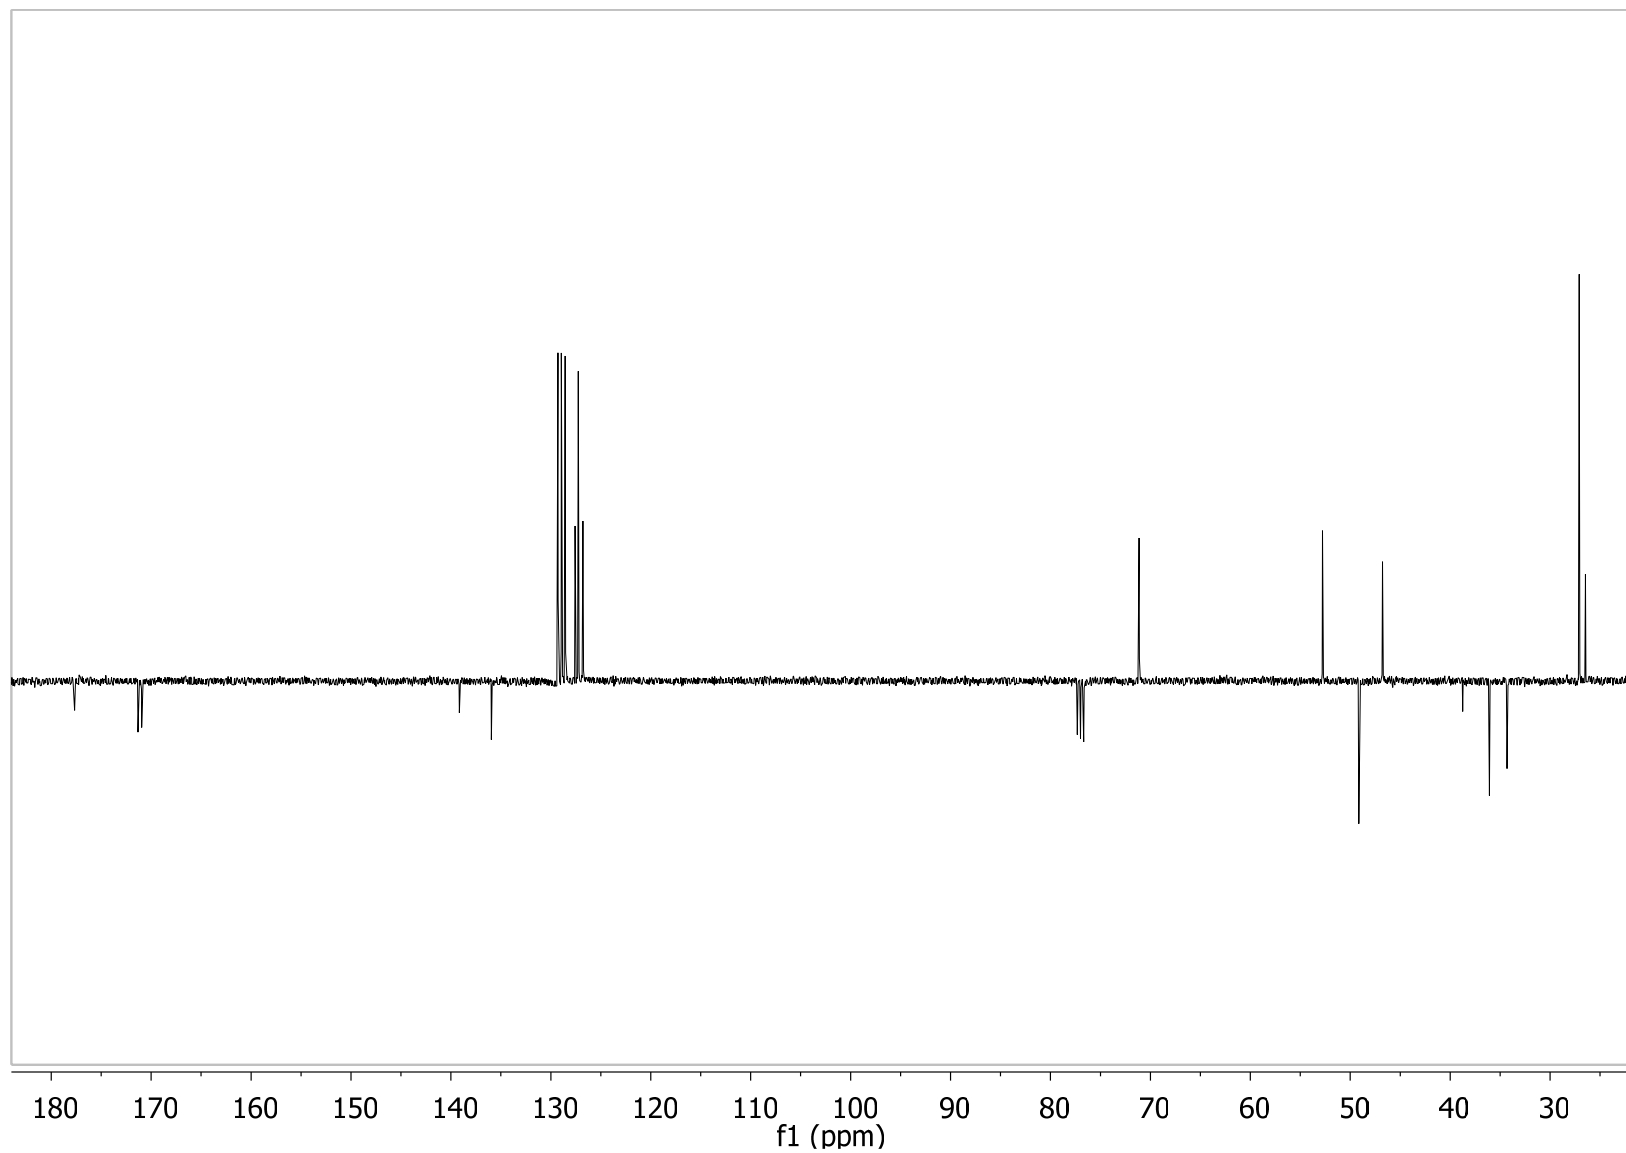

$^{13}\text{C}$ -NMR spectrum of Piv-L-*trans*( $\beta$ Ph)Pro-D-Phe-NHMe (**4**) in  $\text{CDCl}_3$  (100 MHz, 298K)

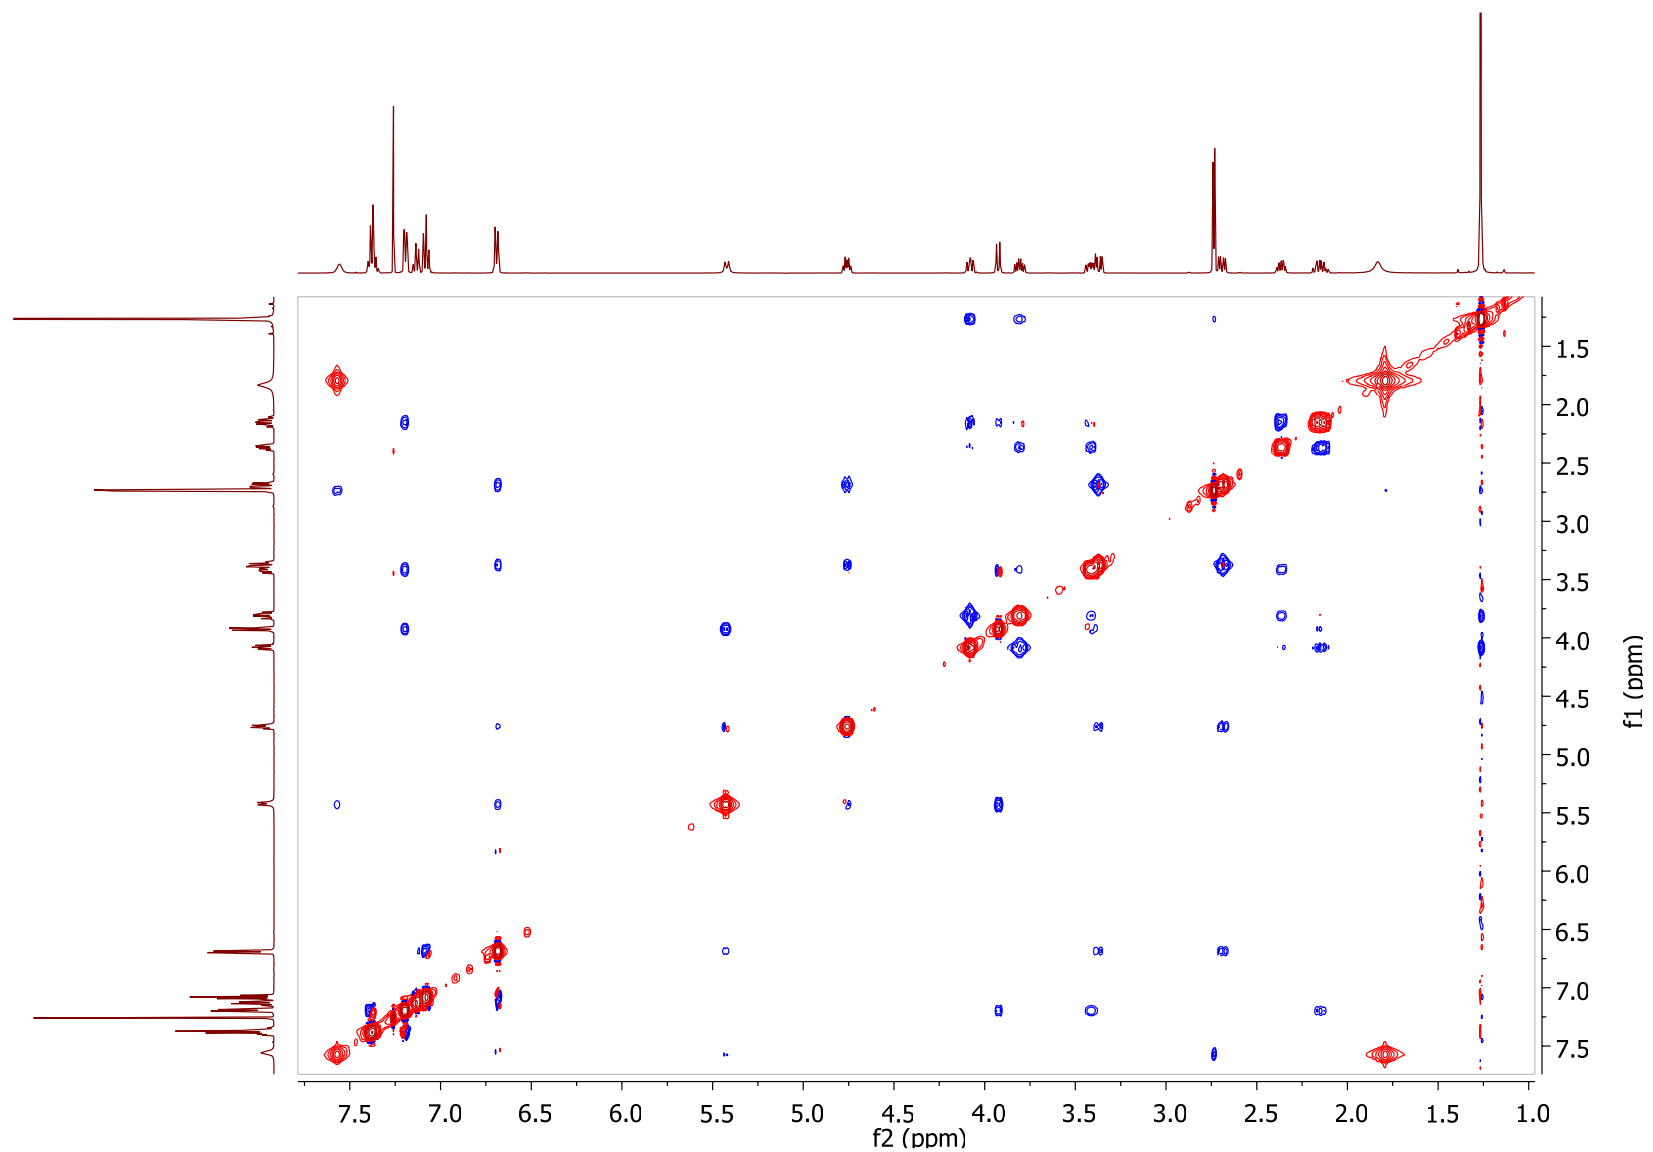

2D-NOESY spectrum of Piv-L-*trans*(βPh)Pro-D-Phe-NHMe (**4**) in CDCl<sub>3</sub> (10 mM, 500 MHz, 298K, 500 ms mixing time)
